# 1 **Both rare and common genetic variants contribute to autism in the Faroe**

## 2 **Islands**

3

### 4 **Short title: The genetic architecture of autism in the Faroe Islands**

5

6 Claire S Leblond<sup>1,2,3,4¶\*</sup>, Freddy Cliquet<sup>1,2,3,4¶</sup>, Coralie Carton<sup>1,2,3,4¶</sup>, Guillaume Huguet<sup>1,2,3,4</sup>,

7 Alexandre Mathieu<sup>1,2,3,4</sup>, Thomas Kergrohen<sup>1,2,3,4</sup>, Julien Buratti<sup>1,2,3,4</sup>, Nathalie Lemièrè<sup>1,2,3,4</sup>,

8 Laurence Cuisset<sup>5</sup>, Thierry Bienvenu<sup>5</sup>, Anne Boland<sup>6</sup>, Jean-François Deleuze<sup>6</sup>, GenMed

9 consortium, Tormodur Stora<sup>7</sup>, Rannva Biskupstoe<sup>8</sup>, Jónrit Halling<sup>9</sup>, Guðrið Andorsdóttir<sup>8</sup>, Eva

10 Billstedt<sup>10</sup>, Christopher Gillberg<sup>10,11&</sup>, and Thomas Bourgeron<sup>1,2,3,4&</sup>

11

12 <sup>1</sup> Institut Pasteur, Human Genetics and Cognitive Functions Unit, Paris, France

13 <sup>2</sup> CNRS UMR 3571 Genes, Synapses and Cognition, Institut Pasteur, Paris, France

14 <sup>3</sup> University Paris Diderot, Sorbonne Paris Cité, Paris, France

15 <sup>4</sup> Centre de Bioinformatique, Biostatistique et Biologie Intégrative, Paris, France

16 <sup>5</sup> Laboratoire de Génétique et Biologie Moléculaires, Hôpital Cochin, HUPC, Paris, France

17 <sup>6</sup> Centre National de Recherche en Génomique Humaine (CNRGH), Institut de Biologie

18 François Jacob, CEA, Université Paris-Saclay, Evry, France

19 <sup>7</sup> Department of Psychiatry, National Hospital Faroe Islands, Tórshavn, Faroe Islands

20 <sup>8</sup> Ministry of Health Genetic Biobank of the Faroes Tórshavn Faeroe Islands

21 <sup>9</sup> Faculty of Science and Technology, The University of the Faroe Islands, Tórshavn, Faroe

22 Islands

23 <sup>10</sup> Gillberg Neuropsychiatry Centre, Institute of Neuroscience and Physiology, Gothenburg

24 University, Gothenburg, Sweden

25 <sup>11</sup> University of Glasgow, Glasgow, Scotland

26

27

28 \* Corresponding author

29 E-mail: [claire.leblond@pasteur.fr](mailto:claire.leblond@pasteur.fr)

30

31

32 ¶ These authors contributed equally to this work.

33 & These authors also contributed equally to this work.

34

35

36 **Abstract**

37 **The number of genes associated with autism is increasing, but few studies have been**  
38 **performed on epidemiological cohorts and in isolated populations. Here, we investigated**  
39 **357 individuals from the Faroe Islands including 36 individuals with autism, 136 of their**  
40 **relatives and 185 non-autism controls. Data from SNP array and whole exome**  
41 **sequencing revealed that individuals with autism compared to controls had a higher**  
42 **burden of copy-number variants ( $p < 0.05$ ), higher inbreeding status ( $p < 0.005$ ) and**  
43 **higher load of homozygous deleterious variants ( $p < 0.01$ ). Our analysis supports the role**  
44 **of several genes/loci associated with autism (e.g. *NRXN1*, *ADNP*, 22q11 deletion) and**  
45 **identified new truncating (e.g. *GRIK2*, *ROBO1*, *NINL* and *IMMP2L*) or recessive**  
46 **deleterious variants (e.g. *KIRELL3* and *CNTNAP2*) affecting autism-risk genes. It also**  
47 **revealed three genes involved in synaptic plasticity, *RIMS4*, *KALRN* and *PLA2G4A*,**  
48 **carrying *de novo* deleterious variants in individuals with autism without intellectual**  
49 **disability. In summary, our analysis provides a better understanding of the genetic**  
50 **architecture of autism in isolated populations by highlighting the role of both common**  
51 **and rare gene variants and pointing at new autism-risk genes. It also indicates that more**  
52 **knowledge about how multiple genetic hits affect neuronal function will be necessary to**  
53 **fully understand the genetic architecture of autism.**

54 **Author summary**

55

56 **Autism is characterized by problems in social communication and stereotyped behavior.**

57 **To improve our understanding of the genetic architecture of autism, we studied a group**

58 **of children and adolescents from the Faroe Islands, an isolated population living on**

59 **archipelago located in the North Atlantic Ocean, halfway between Norway, Iceland and**

60 **Scotland since the 9<sup>th</sup> century. The genetic profile of this small but genetically**

61 **homogenous epidemiological cohort of the Faroe individuals revealed that both rare**

62 **and common genetic variants contribute to the susceptibility to autism. Our analysis**

63 **supports the role of several genes previously associated with autism and points at new**

64 **candidate genes involved in the neuronal connectivity of the brain. In summary, our**

65 **analysis provides a comprehensive framework to analyze the complex heterogeneity of**

66 **autism in order to improve the diagnostic, the care and the integration of individuals**

67 **with autism.**

68

## 69 **Introduction**

70 Autism spectrum conditions (ASCs; henceforth 'autism') are diagnosed in 1-2% of the  
71 population worldwide and are characterized by atypical social communication and the  
72 presence of restricted interests, stereotyped and repetitive behaviors. Individuals with autism  
73 can also suffer from psychiatric and medical conditions including intellectual disability (ID),  
74 epilepsy, motor control difficulties, attention-deficit hyperactivity disorder (ADHD), tics,  
75 anxiety, sleep disorders, depression or gastrointestinal problems (1). The genetic  
76 susceptibility to autism can vary from one individual to another. In some cases, a single *de*  
77 *novo* variant can be detected. On the contrary, in some cases, the genetic architecture is more  
78 complex and involved thousands of common genetic variants, each one with low impact but  
79 collectively increasing the susceptibility to autism (2). Most of our knowledge on the genetics  
80 of autism comes from studies on unrelated individuals with autism who do not share a recent  
81 common ancestor. Several studies investigated families with autism from countries where  
82 consanguinity is high (3,4), but the genetic architecture of autism in isolated populations  
83 remains largely unknown.

84         The Faroe Islands is an archipelago located in the North Atlantic Ocean, halfway  
85 between Norway, Iceland and Scotland (Fig 1A). The population (approximately 49,000  
86 inhabitants) was founded in the 9<sup>th</sup> century by a small number of emigrants from Norway. The  
87 population remained at a small size for centuries until they experienced a rapid expansion in  
88 the 1800s. Previous genetic studies indicated that individuals from Scotland, Norway,  
89 Sweden, Ireland, Iceland and British Isles have significantly contributed to the current gene  
90 pool of the Faroese population (5,6).

91         We previously showed that the prevalence of autism in the Faroe Islands (0.94% of the  
92 population (7–9)) was similar to many other western countries. In this study, we ascertained  
93 the genetic profile of 357 individuals including an epidemiological cohort of 36 individuals

94 with autism born between 1985 and 1994 (Fig 1 and S1 Fig), their relatives (n=136) and a  
95 group of 185 controls. We first investigated the known causes of autism and then identified  
96 new candidate genes. We also ascertained the impact of inbreeding and the load of deleterious  
97 homozygous variants on the risk of autism. Finally, both rare and common genetic variants  
98 were used to stratify individuals with autism and to compare their genetic and clinical  
99 profiles.

100

## 101 **Results**

### 102 **The genetic diversity in the Faroe Islands**

103 A total of 67 children and adolescents with autism were detected in a total population study of  
104 individuals aged 8-17 years living in the Faroe Islands and born between 1985 and 1994  
105 (8,10). Thirty-six of the 67 individuals (54% of the total group) signed (or had parents who  
106 signed) informed consent forms and were included in the genetic study. Participants and non-  
107 participants in the genetic study were similar in terms of gender and cognitive abilities (Fig  
108 1B). In addition, we collected DNA from 136 of their relatives and from 185 "non-autism  
109 controls. The genetic profile included a high-density Illumina SNP array interrogating > 4.3  
110 millions of single nucleotide polymorphisms (SNPs) and a whole exome sequencing (WES)  
111 to discover new variants. Using identical-by-state (IBS) genomic distance (see materials and  
112 methods), we first compared the population structure of individuals from the Faroe Islands  
113 with worldwide populations (Fig 1C). All individuals were clustered in the Faroese  
114 population (with the exception of seven controls, but still with European genetic background).  
115 Using admixture, we showed that individuals from the Faroe Islands have their genome in  
116 majority constituted from "European component" (S2 Fig). As expected from the  
117 demographic history, individuals from the Faroese population displayed a higher degree of  
118 inbreeding compared with others world populations (Fig 1D).

119

### 120 **Contribution of *de novo* variants**

121 We ascertained the burden of *de novo* variants since they are key players in the genetics of  
122 autism (11,12). The *de novo* variants were identified for 31 independent families including 28  
123 individuals with autism and 45 siblings for whom DNA of both parents was available (see  
124 Clinical notes in S1 Appendix for the pedigrees). The combined analysis of genotyping and  
125 WES data revealed the presence of *de novo* chromosomal abnormalities and exonic copy-

126 number variants (CNVs) in 3 out of 26 individuals with autism (11.5%) and 1 out of 43  
127 siblings (2.3%). One female PN400129 had a trisomy of chromosome 21 and was diagnosed  
128 with autism, ID and Down syndrome (S3 Fig and S1 Table). One female PN400533 with  
129 atypical autism without ID carried a *de novo* 2.9 Mb deletion on chromosome 22q11 causing  
130 DiGeorge/velocardial syndrome. A male PN400115 with atypical autism without ID carried a  
131 *de novo* 425.5 kb deletion removing the six first exons of the *NRXN1α*. We also found a 91.4  
132 kb deletion removing all exons of *ADNP* in a male with autism and ID (PN400125). The  
133 deletion was not found in the mother and was most likely *de novo*, but father's DNA was not  
134 available and none of the SNPs within the deletion were informative to confirm the *de novo*  
135 status of the deletion. The *de novo* CNV observed in the sibling (PN400170) was a  
136 duplication of 782 kb affecting 5 genes (*CNPY1*, *DPP6*, *EN2*, *HTR5A*, *INSIG1* and *PAXIP1*).

137         Using the WES data, we detected the presence of *de novo* single nucleotide variants  
138 (SNVs) and small insertions/deletions (indels)(S2 Table). Overall, the rate of *de novo* exonic  
139 SNV/indels was similar to other studies (13) and was not different in individuals with autism  
140 (0.93) and their siblings (0.96). The variants were considered as probably deleterious when  
141 they were likely gene disruptive (LGD, for example stop gain or frame shift variant) or  
142 missense events with a combined annotation dependent depletion (CADD) score > 30  
143 (MIS30) (14). There was also no significant increase in the rate of *de novo* deleterious  
144 variants in individuals with autism compared to their siblings and no significant enrichment in  
145 genes associated with autism (SFARI genes (15)) or expressed in the brain (Brain genes, see  
146 subjects and methods for gene selection). Nevertheless, several deleterious variants were  
147 identified in known genes for autism (*MECP2*) or compelling candidate genes (*RIMS4*,  
148 *KALRN*, *PLA2G4A*) (S4 Fig). Clinical details on the individuals with autism carrying those  
149 variants are available in the S1 Appendix.

150



## 151 **Contribution of rare CNVs and SNVs/indels variants**

152 The overall burden of exonic CNVs was higher in individuals with autism compared to  
153 controls for both deletions ( $p = 0.02$ ) or duplication ( $p = 0.006$ ) (Fig 2A and S3 Table). The  
154 burden of deletions was also higher for autism-associated genes listed in the SFARI database  
155 ( $p = 0.01$ ), for genes intolerant to loss-of-function variant (pLI > 0.9) (16) ( $p = 0.01$ ) or genes  
156 expressed in the brain ( $p = 0.02$ ). For duplications, only genes expressed in the brain were  
157 more frequently duplicated in individuals with autism compared to controls ( $p = 0.005$ ).  
158 These differences however do not survive corrections for multiple tests and we had no  
159 significant difference between individuals with autism and their siblings. Among the SFARI  
160 genes affected by the CNVs, we identified a 58 kb maternal inherited deletion including the  
161 *IMMP2L*, a 2 Mb paternal inherited duplication on the pseudo-autosomal region 1 including  
162 *SHOX* and *ASMT*, and a 39 kb maternal inherited duplication of *TBLIXR1* (S3 Table).

163 Our analysis was restricted to CNVs affecting exons, but a large 357 kb duplication  
164 within intron 5 of the *NLGNI* gene and covering a long *NLGNI* antisense noncoding RNA  
165 was paternally inherited in a female (PN400102) with autism and no ID. There was no such  
166 rare intronic CNVs in the SFARI genes in siblings and controls.

167 We then run gene-wise association tests from rare SNV/indels (MAF < 5%). None of  
168 associations were gene wide significant, but *KIF1B*, *FOXD3*, *RNF181* and *SDPR* were among  
169 the top genes ( $p < 0.001$ ) detected by both the CMC-EMMAX and SKAT-O analyses (Fig  
170 2B, S5 Fig and S4-S5 Tables). For *FOXD3*, *RNF181*, and *SDPR* the association was mainly  
171 driven by one missense variant, whereas for *KIF1B*, several variants contributed to the  
172 association. Single variant tests were performed (S6 Table) and among the hits with  
173  $p < 0.009$ , two variants affect genes previously associated with neurodevelopmental disorders  
174 (NDD). A variant p.R276W in *NINL*, a gene previously associated with autism (17) was more  
175 frequent in individuals with autism (P400121 was homozygous) compared to controls

176 ( $p = 0.0005$ ). This Ninein-like protein is known to associate with motor complex and interact  
177 with the ciliopathy-associated proteins lebercilin, USH2A and CC2D2A. A *CHAMP1* variant  
178 (p.A586S) was more frequent in individuals with autism compared with controls ( $p < 0.003$ )  
179 and it was previously shown that *de novo* variants in *CHAMP1* cause ID with severe speech  
180 impairment (18).

181 Finally, we found truncating variants affecting several SFARI genes (*e.g.* *PRODH*,  
182 *ERBB4*, *GRIK2*, *ROBO1*, *RBMS3*, and *IMMP2L*; Fig 2B and S7 Table), but the number of  
183 individuals with autism carrying these variants was too low to detect a significant association.

184

### 185 **Contribution of recessive variants**

186 Since inbreeding increases the risk for individuals to carry homozygous deleterious variants,  
187 we first compared the inbreeding status of the individuals with autism, their relatives and  
188 controls. Patients ( $p < 0.005$ ) as well as their siblings ( $p < 0.01$ ) had a higher inbreeding  
189 coefficient compared with controls (Fig 3A). More interestingly, we found that individuals  
190 with autism were carrying more deleterious homozygous variants (LGD, MIS30, gnomAD  
191 MAF < 1%) than controls ( $p < 0.0005$ ; Fig 3B and S8 Table). Genes carrying deleterious  
192 homozygous variants in affected individuals were significantly enriched in the combined  
193 gene-set lists (SFARI + pLI > 0.9 + Brain genes) compared to controls ( $p < 0.05$ ; Fig 3C).

194 In one consanguineous family, we found a *KIRREL3* homozygous damaging missense  
195 variant (p.R562L) affecting a conserved residue in the cytoplasmic domain of this synaptic  
196 adhesion molecule (19) listed in SFARI and associated with NDD (20,21) (22) (Fig 3D).  
197 Interestingly, the female PN400528 with autism and a normal IQ was also homozygous for  
198 another deleterious variant (p.N687K) affecting *TECTA*, a SFARI gene associated with  
199 autism (21) and deafness (23).

200 In another family, the male PN400579 was homozygous for two variants affecting  
201 *CNTNAP2* and *PEX6* (Fig 3E). Recessive *CNTNAP2* variants are associated with Pitt-  
202 Hopkins like syndrome 1 and cortical dysplasia-focal epilepsy syndrome (MIM #610042).  
203 The *CNTNAP2* p.E680K variant affects a highly conserved amino acid within the fibrinogen  
204 domain of the protein. Recessive *PEX6* variants are associated with Heimler syndrome 2 a  
205 recessive peroxisome disorder characterized by sensorineural hearing loss, amelogenesis  
206 imperfecta and nail abnormalities, with or without visual defects (MIM #616617). The  
207 homozygous variant p.R601Q carried by the male with autism can be considered pathogenic  
208 since it was previously detected in several independent patients diagnosed with Heimler  
209 syndrome 2 (24). Details on the clinical profiles of the families are available in S1 Appendix.  
210

#### 211 **Contribution of common variants**

212 In order to complete the genetic profile of all the individuals, we investigated the contribution  
213 of the common variants (MAF > 5%) using three complementary approaches: (i) genome  
214 wide association studies (GWAS) in cases and controls using three models (allelic, recessive  
215 and dominant), (ii) a burden/collapsing test that aggregates the variants located in a gene, (iii)  
216 a calculation of the autism polygenic risk score.

217 The results of the GWAS are presented in S6-S7 figs and a list of the top 45 loci that  
218 display p-values under  $10^{-5}$  are shown in Fig 2B and S9 Table. Two of these loci were located  
219 within or nearby genes previously associated with NDD. *TNIK* on chromosome 3q26  
220 (rs1492859;  $p = 5.59 \times 10^{-7}$ ) encodes a key synaptic partner of *DISC1*, a gene associated with  
221 psychiatric disorders (25). *TMEFF2* on chromosome 2q32.3 (rs6737056;  $p = 3.47 \times 10^{-7}$ ) is  
222 highly expressed in the brain and is known to modulate the AKT/ERK signaling pathways  
223 that are supposedly perturbed in autism (26). *TMEFF2* is also a target of *CHD8*, a chromatin  
224 remodeling gene associated with autism (27,28). Using the gene-based analysis implemented

225 in MAGMA (29), only one gene *WHAMM* on chromosome 15q25.1 had a  $p < 10^{-5}$  (S10-S11  
226 Tables). *WHAMM* is expressed in the brain and acts as a regulator of membrane dynamics that  
227 functions at the interface of the microtubule and actin cytoskeletons (30).

228 Finally, we ascertained the autism polygenic risk score (PRS-autism) for each  
229 individual (Fig 4). The PRS-autism was calculated using PRSice-2 from a previous GWAS  
230 using over 16,000 individuals with autism (31) who do not overlap with this sample. We  
231 found a significantly higher PRS-autism in individuals with autism compared to controls  
232 ( $p < 0.01$ ; Fig 4A). Remarkably, in the autism group, the PRS-autism was significantly higher  
233 in individuals without ID compared to those with ID ( $p < 0.05$ , Fig 4B).

234

### 235 **Genetic stratification of autism in the Faroe Islands**

236 In order to stratify individuals with autism, we used the number of rare deleterious variants in  
237 SFARI genes (including CNVs) and the PRS-autism estimated from the common variants  
238 (Fig 5). Hierarchical clustering found four clusters. The first one comprised seven individuals  
239 with high PRS-autism and high burden of deleterious variants in SFARI genes. In this cluster,  
240 none of the individuals had ID. The second "cluster" included only one individual who was  
241 diagnosed with autism and Down syndrome with a low PRS-autism and high burden of  
242 SFARI deleterious variants. In the third cluster, fourteen individuals had low PRS-autism and  
243 low burden of SFARI genes deleterious variants. In this cluster 50% of the individuals had  
244 ID. In the fourth cluster, fourteen individuals had higher PRS-autism, but low burden of  
245 SFARI deleterious variants. In this cluster, 29% of the individuals had ID and it includes the  
246 three individuals with autism with epilepsy from the cohort.

247

## 248 **Discussion**

249 In this study, we investigated a group of individuals with autism that has two distinctive  
250 features. First, the group is representative of a general population cohort of all young people  
251 living in the Faroe Islands at one point in time, meaning that it was not biased for  
252 inclusion/exclusion criteria used for research studies. Secondly, the Faroese population has a  
253 more homogeneous genetic background compared to most other populations.

254

### 255 **Autism-risk genes in the Faroe Islands**

256 We found a subset of individuals carrying strongly deleterious variants (some of which  
257 appeared *de novo*) affecting single gene or chromosomal regions. The chromosomal  
258 abnormalities included on case each of trisomy 21 and 22q11 deletion (causing Down and  
259 DiGeorge/velocardial syndromes, respectively). This was not surprising to find such known  
260 genetic disorders in an epidemiologic cohort since the prevalence of autism in individuals  
261 diagnosed with these syndromes is higher than in the general population (16-37% for Down  
262 syndrome (32), and 23-50% for DiGeorge/velocardial syndrome deletion (33,34)). We also  
263 revealed new variants in known autism-risk genes (*ADPNP*, *NRXN1*, *NINL*, *MECP2*) and  
264 points at new compelling candidate genes such as *KALRN*, *PLA2G4A* and *RIMS4*.

265 The *KALRN* gene encodes for a guanine nucleotide exchange factor (GEF) with strong  
266 homology to *TRIO*, a gene previously associated with autism (35). *KALRN* is expressed in  
267 neuronal tissue during embryonic development (36) and has been associated with  
268 schizophrenia risk through association analysis and postmortem analyses of individuals with  
269 autism' cortical *KALRN* mRNA and protein levels (37)(38). It is also a binding partner of the  
270 Huntingtin and a regulator of structural and functional plasticity at dendritic spines. The *de*  
271 *novo* variant (p.N2024D; CADD=26.7) was never observed in the general population affects a  
272 key amino acid of the GEF domain conserved through evolution and present in *Drosophila*

273 *melanogaster* and *Caenorhabditis elegans*. The male individual (PN400117) carrying this *de*  
274 *novo* *KALRN* variant has no ID.

275 *PLA2G4A* gene encodes the cytosolic phospholipase A2 $\alpha$  that catalyzes the hydrolysis  
276 of membrane phospholipids to produce arachidonic acid. Mice lacking *Pla2g4a* display  
277 abnormalities in neuronal maturation (narrow synaptic cleft) (39) and long-term potentiation  
278 (LTP) (40). The *de novo* variant (p.R485C; CADD=35) has never been observed in the  
279 general population and is predicted as a deleterious variant falling in the catalytic domain of  
280 the protein. The female PN400102 carrying this *de novo* variant has no ID.

281 *RIMS4* codes for a presynaptic proteins that plays a key role for dendritic and axonal  
282 morphogenesis (41). *RIMS1* and *RIMS3* have already been associated with autism (42–44) .  
283 The individual (PN400137) carrying the *de novo* *RIMS4* stop variant (p.Y204\*; CADD=38)  
284 has a normal IQ (Performance IQ=108, Verbal IQ=116). The variant is predicted to truncate  
285 the last quarter of the protein and was never observed in the general population. Interestingly,  
286 RIM proteins interact with voltage-dependent Ca(2+) channels (VDCCs) and suppress their  
287 activity at the presynaptic active zone to regulate neurotransmitter release. Knockdown of  
288 gamma-RIMs (*RIMS3* and *RIMS4*) attenuated glutamate release to a lesser extent than that of  
289 alpha-RIMs (*RIMS1* and *RIMS2*). As a consequence, competition between alpha- and gamma-  
290 RIMs seems to be essential for modulating the release of glutamate at the synapse (45). We  
291 can therefore hypothesize that the *de novo* *RIMS4* truncating stop variant perturbs the fine-  
292 tuning of glutamatergic release at the synapse and contributes to autism.

293

294 **High inbreeding slightly increases the risk of autism, but no evidence for a founder**  
295 **effect for autism in the Faroe Islands.**

296 In genetic isolates, it is frequent to observe an increase frequency of diseases due to the  
297 presence of deleterious variants that were present in the genomes of the small group of

298 migrants who settled the population. In the Faroe Islands, this “founder effect” was  
299 documented for several genetic diseases such as Bardet-Biedl syndrome (46), cystic fibrosis  
300 (47), 3-Methylcrotonyl-CoA carboxylase deficiency (48), glycogen storage disease type IIIA  
301 (49) and retinitis pigmentosa (50). We confirmed that inbreeding in the Faroe Island is higher  
302 than expected compared with other populations. The median of inbreeding is  
303  $F = 0.015 \pm 0.001$  in the control sample and is similar to the one reported by Binzer et al.  
304 (2014) in their study on multiple sclerosis in the Faroe Islands ( $F = 0.018$ ) (51). This level of  
305 inbreeding corresponds approximately to children from parents with a second-cousin  
306 relationship ( $F = 0.016$ ). We also observed that individuals with autism from the Faroe  
307 Islands have significantly higher level of inbreeding and burden of recessive deleterious  
308 variants compared to their geographically matched controls. The homozygous deleterious  
309 variants carried by individuals with autism were enriched in genes included in our list of  
310 genes of interest (*e. g.* high intolerance for loss of function variants, expressed in the brain  
311 and previously associated with autism). However, one should note that the increased  
312 probability for having autism due to inbreeding in the Faroe Islands is relatively small  
313 ( $F_{\text{autism}} = 0.0189$ ;  $F_{\text{controls}} = 0.0148$ ;  $OR = 1.28$ ;  $p = 0.0047$ ).

314 In contrast to other genetic conditions, we could not detect a founder effect for autism  
315 in the Faroe Islands. Moreover, the loci identified in our study do not overlap with those  
316 detected in a previous genetic microsatellite association study in the Faroese population  
317 pointing at regions on 2q, 3p, 6q, 15q, 16p, and 18q (52). We also found no overlap between  
318 the variants identified in our study and those found in Faroese individuals with autism  
319 diagnosed with panic (53) or bipolar (54) disorders. This absence of a founder effect is also in  
320 agreement with the epidemiological observation that the prevalence of autism in the Faroese  
321 population is not higher compared to more outbred populations.

322

## 323 **Perspectives**

324 Our study confirms that both rare and common genetic variants contribute to the susceptibility  
325 to autism. Indeed, although, we identified previously known genetic causes for autism and  
326 pointed at new compelling candidate genes, we also showed a contribution of the common  
327 variants illustrated by the higher level of PRS-autism in individuals with autism (especially  
328 those with no ID) compared to controls. To date, in the literature, very few genes are  
329 identified in individuals diagnosed with autism, but with intact general intelligence. Based on  
330 the genes previously reported (*NLGN3*, *NLGN4X*, duplication of *SHANK3*) (55,56) and the  
331 genes found in this study (*RIMS4*, *KALRN*, *PLA2G4A*), it seems that the proteins involved in  
332 autism without ID converge to different part of the post- and pre-synapse rather than to  
333 pathways such as gene regulation and chromatin remodeling, but this has to be confirmed on  
334 larger cohorts. Indeed, the main limitation of our study is the small number of individuals  
335 with autism. Several LGD variants affecting autism-risk genes such as *GRIK2* (57) or *ASMT*  
336 (58) were found exclusively or more frequently in individual with autism compared to  
337 controls, but we lack a replication samples to confirm the contribution of these variants in the  
338 susceptibility to autism in the Faroe Islands.

339 In summary, this study improves our knowledge on the genetic architecture of autism  
340 in epidemiological cohorts and in genetic isolates by showing that the contribution of both  
341 rare and common gene variants to autism can be detected in small, but genetically  
342 homogeneous populations. It also provides new compelling candidate genes and reveals that  
343 high inbreeding and high load of homozygous deleterious variants can be a risk factor for  
344 autism. Such combined analysis investigating both rare and common gene variants might  
345 represent a useful framework to investigate, from groups to individuals, the complex genetic  
346 architecture of autism.

347



## 348 **Materials and Methods**

### 349 **Ethics statement**

350 This study was approved by the IRB of the “Institut Pasteur” of Paris (IRB00006966 Institut  
351 Pasteur, approval 2010-003).

352

### 353 **Patients**

354 All individuals with autism in this study were recruited from an epidemiological cohort  
355 through a two-phase screening and diagnostic process targeting all children born in the 10-  
356 year period from 1985 through 1994 and living in the Faroe Islands in 2002 (7-16 years,  
357 n=7,689 children) and 2009 (15-24 years, n= 7,128 children) (8)-(10). The total number of  
358 children diagnosed with autism was 67 which corresponds to an autism prevalence of 0.94%.  
359 Among the individuals with autism, 23% were diagnosed with childhood autism, 56% with  
360 Asperger syndrome and 21% with atypical autism. There were 49 males (73.1%) and 18  
361 females (26.9%). DNA was available for 36 individuals with autism including 11 diagnosed  
362 with childhood autism (31%), 17 with Asperger syndrome (47%), and 8 with atypical autism  
363 (22%). There were 28 males (78%) and 8 females (22%). The non-autism controls were  
364 recruited by issuing an invitation with information on the study to all pupils at the high school  
365 level in winter 2008-2009. The schools invited are in Eysturoy, Suduroy and Torshavn. The  
366 age of the invited was from 14-24 years. For those under 18 years a letter was sent to the  
367 parents that could sign the consent for their children.

368

### 369 **Screening and diagnosis**

370 In 2002, screening included the use of the Autism Spectrum Screening Questionnaire (ASSQ)  
371 (59). Screen-positive children were thoroughly examined via Diagnostic Interview for Social  
372 and Communication Disorder (DISCO-10 in 2002 and DISCO-11 in 2009) (60) of one or both

373 parents and the Wechsler Intelligence Scale for Children – 3<sup>r</sup> edition (WISC) or Wechsler  
374 Adult Intelligence Scale – Revised (WAIS). Whenever overall and verbal abilities allowed it  
375 possible, children were also interviewed in an unstructured/semistructured manner about  
376 interests and skills patterns, peer relations, family relationships and about formal general  
377 information knowledge. The following diagnostic criteria used when making clinical  
378 diagnoses were (a) ICD-10 criteria for childhood autism/autistic disorder; (b) Gillberg criteria  
379 for Asperger syndrome; (c) ICD-10 criteria for atypical autism with the added requirement  
380 that a case thus diagnosed could not meet full criteria for childhood autism or Asperger  
381 syndrome; and (d) ICD-10 criteria for disintegrative disorder.

382         The majority of children in the atypical autism and Asperger syndrome groups had  
383 been tested with the WISC-R. Those with childhood autism had usually been tested on other  
384 tests. In those intellectually low-functioning individuals for whom no test was available, IQ  
385 was estimated on the basis of the Vineland developmental portion that is part of the DISCO-  
386 interview.

387

### 388 **Genotyping**

389 The cohort available for the genotyping is shown in Fig 1 and S1 Fig. It includes 36  
390 individuals with autism, 208 controls, 132 close relatives of the individuals with autism (61  
391 siblings and 68 parents) and 10 close relatives from the controls. DNA was extracted from  
392 blood leukocytes. The genotyping was performed at the “Centre National de Recherche en  
393 Génomique Humaine (CNRGH)” using the Infinium IlluminaOmni5-4 BeadChip (> 4.3  
394 millions of markers) from Illumina. Sample quality controls such as Sex check (based on the  
395 X chromosome homozygosity rate), Mendel errors (transmission errors within full trios) and  
396 Identity By State (IBS, see section below) were performed using PLINK 1.90 (61).

397

## 398 **Population genetic structure**

399 Genome-wide pairwise IBS calculations and Multidimensional scaling (mds) analysis on  
400 genome-wide IBS pairwise distances matrix was calculated using PLINK 1.90. IBS values  
401 have been calculated for 376 individuals from Faroe Islands and 1,184 individuals from  
402 HapMap phase 3 project with the following calculation:  $1 - (0.5 * IBS1 + IBS2)/N$ ; N is the  
403 number of tested markers; IBS1 and IBS2 are the number of markers for which one pair of  
404 individuals share either 1 or 2 identical allele(s), respectively. Out of the 376 individuals, 32  
405 individuals were removed from further analyses, including 7 ancestry outliers (all controls), 9  
406 siblings of controls, one swap and 15 control individuals involved in pairs with IBS score  
407 superior to 0.9.

408 For the estimation of the inbreeding status, SNPs with genotyping call rate < 95%,  
409 minor allele frequency < 0.05, strong linkage disequilibrium  $r > 0.5$  or failing Hardy  
410 Weinberg equilibrium test ( $p < 10^{-6}$ ) were filtered out of the Faroe SNP genotyping dataset.  
411 All homozygosity analyses were performed with Plink 1.09 on autosomes including  
412 identification of Runs Of Homozygosity (ROH) and Inbreeding coefficients calculation. For  
413 ROH detection, a threshold of 50 consecutive homozygous SNPs with a minimum density of  
414 1 SNP / 5,000 kb and no minimum length 50 SNPs was used following Howrigan et al.'s  
415 guidelines (62). No heterozygous markers were allowed in the 50 SNPs-window. In this analysis,  
416 the maximum gap between two consecutive SNPs within a run was set to 5,000 kb. Inbreeding  
417 coefficients were calculated by estimating the proportion of the autosomal genome that is in  
418 ROH. This method was proposed by McQuillan and al (2008)(63) and has been showed to be  
419 the most reliable, especially with small sample size(64). Faroe inbreeding coefficients were  
420 compared to inbreeding coefficient of HapMap phase 3 project populations.

421

## 422 **Genome-wide association study (GWAS)**

423 Prior association analyses, SNPs with genotyping call rate < 90%, minor allele  
424 frequency < 0.05 or failing Hardy Weinberg equilibrium test ( $p < 10^{-6}$ ) were filtered out of the  
425 Faroe SNP genotyping dataset. The global genome wide genotyping call rate of all the  
426 individuals was superior to 90%. A total of 1,690,491 variants and 212 independent  
427 individuals (including 36 cases and 176 controls) passed filters and QC. Allelic, recessive and  
428 dominant GWAS were performed with Plink 1.09 using Chi-squared statistics. Manhattan and  
429 Quantile-Quantile (Q-Q) plots were generated using R. Gene and gene-set (including SFARI,  
430 pLI > 0.9 and Brain gene lists) analyses were performed with MAGMA v1.06 (29) using  
431 principal components regression and linear regression model, respectively.

432

## 433 **Polygenic risk score (PRS) for autism**

434 The computation of the PRS was performed with the tool PRSice2 (65) on the Faroes SNP  
435 array data using as a reference the PGC GWAS summary statistics (31). SNPs were not  
436 imputed since we used high density arrays (over 4 millions SNPs). For our dataset, PRSice2  
437 with default parameters defined a p-value threshold of 0.197 which gives us a  $R^2$  (squared  
438 correlation coefficient) of 0.04.

439

## 440 **Whole-Exome Sequencing (WES)**

441 Blood leukocytes DNA from 286 individuals was enriched for exonic sequences through  
442 hybridization SureSelect Human All Exon V5 (Agilent) by the CNRGGH. For 67 individuals  
443 for whom the available quantity of DNA was low, they used a low-input protocol using only  
444 200 ng of DNA compared to 3  $\mu$ g for the normal protocol. The captured DNA was sequenced  
445 using a HiSeq 2000 instrument (Illumina). Coverage/depth statistics have been accessed as  
446 quality control criteria. We required that more than 90% of each exome have 10X coverage

447 and more than 80% have 20X coverage. Short read sequences were then aligned to hg19 with  
448 BWA v0.7.8, duplicate reads were removed with PicardTools MarkDuplicates. Reads with a  
449 global quality under 30 and a mapping quality under 20 were excluded from the analysis.  
450 Variants were predicted using FreeBayes (66) and GATK (67) with a minimum of 10 reads  
451 covering the position. VEP (using RefSeq and Ensembl 91) was used to annotate the variants.  
452 We used the GEMINI (68) framework that automatically integrates the VCF file into a  
453 database for exploring genetic variant for disease and population genetics. Genetic variants  
454 were analyzed using GRAVITY, a Cytoscape (69) plugin designed in the lab specifically for  
455 interpreting WES results using Protein-Protein Interaction networks  
456 (<http://gravity.pasteur.fr/>). Gravity uses a user-friendly interface and makes easier prioritizing  
457 variants according to damage prediction, mode of inheritance, gene categories and variant  
458 frequency in databases. It allows filtering variants with many parameters, such as quality  
459 parameters (DQ, MQ, GQ), allelic fraction, frequency of the variant in the cohort or in  
460 databases, damage prediction scores (CADD, SIFT, Polyphen2) and many more. Since WES  
461 does not detect the *FMRI* amplification, 33 individuals with autism were tested for Fragile-X  
462 syndrome using the AmplideX™ *FMRI* PCR kit from Theradiag. There were no individuals  
463 with “pre-mutation” or “full-mutation” of CGG repeats in the 5' UTR region of the fragile X  
464 mental retardation-1 (*FMRI*) gene.

465

#### 466 **Copy-number variants (CNVs)**

467 CNVs were identified from both SNP genotyping and WES data. Quality controls were the  
468 following: call rate > 0.99, standard deviation of the Log R ratio < 0.35, standard deviation of  
469 the B allele frequency < 0.08 and absolute value of the wave factor < 0.05. CNVs were  
470 detected by both PennCNV(70) and QuantiSNP(71) algorithm using the following  
471 filters:  $\geq 3$  consecutive probes, CNV size > 1kb and CNV detection confidence score  $\geq 15$ .

472 CNV detections from PennCNV and QuantiSNP were merged using CNVision(17). CNVs  
473 with CNVision confidence score  $< 30$ , CNV size  $< 50$  kb, overlap  $> 50\%$  with segmental  
474 duplication or known large assembly gaps (greater than 150 kb) or copy number = 2 in  
475 pseudo autosomal regions (PARS) in males were filtered out. CNV annotations were  
476 performed using ANNOVAR (72) and CNV frequencies in Faroese and in database of  
477 genomic variant cohorts (DGV, <http://dgv.tcag.ca/dgv/app/home>) were assessed using in  
478 house python scripts based on reciprocal overlap  $\geq 80\%$ . We also detected CNVs from the  
479 WES sequencing data using the XHMM software(73). CNVs with QSOME score  $< 90$ ,  
480 number of targets  $< 5$ , or overlap  $> 50\%$  with segmental duplication or known large assembly  
481 gaps (greater than 150 kb) were filtered out. CNV annotations were performed using  
482 ANNOVAR (72) and CNV frequencies in Faroese were assessed using in house python  
483 scripts based on reciprocal overlap  $\geq 80\%$ . *De novo* and inherited CNVs were validated by  
484 visual inspection using SnipPeep (<http://snippeep.sourceforge.net/>).

485

#### 486 **Gene-set lists and prioritization of variants**

487 Three gene-set lists were used : (i) “SFARI genes” (n=990) that includes genes implicated in  
488 autism (15) (Simons Foundation Autism Research Initiative gene database -  
489 <https://gene.sfari.org/>); (ii) “pLI  $> 0.9$  genes” that includes genes with strong probability of  
490 being loss-of function intolerant (n=3,230) (74); (iii) “Brain genes” that includes genes  
491 specifically or strongly expressed (above 1 Standard Deviation) in fetal or adult human brain  
492 using data from Su et al (n=3,591)(75).

493 A combination of approaches was used to prioritize the genes and to estimate the  
494 deleterious effect of a variant. We prioritized genes using gene sets (SFARI genes, pLI  $\geq 0.9$   
495 and Brain genes, previously defined). We prioritized Likely Gene Disruptive (LGD) variants  
496 (stopgains, splice site variants, frameshift indels) over missense variants or synonymous

497 variants. Additionally, we used the CADD score (14) (a CADD  $\geq 30$  means that the variants  
498 belong to the 0.1% most deleterious variants) to assess the deleterious effect missense  
499 variants. Minor allele frequency (MAF) was estimated in the general population from the  
500 gnomAD database(74). In order to filter out common variants that was not listed in gnomAD,  
501 we also excluded variants that were present in more than 15% of our Faroese control cohort.  
502 For the detection of deleterious homozygous variants, we kept only LGD and MIS30 with  
503 MAF  $< 1\%$ .

504

### 505 **Burden analysis**

506 Rare variant association studies (MAF $<5\%$ ) were performed using EPACTS v3.2.6  
507 (<https://genome.sph.umich.edu/wiki/EPACTS>). Prior association analysis, variants identified  
508 by WES were filtered using VCFtools ([http://vcftools.sourceforge.net/man\\_latest.html](http://vcftools.sourceforge.net/man_latest.html)) with  
509 the following metrics: minimum genotyping quality  $\geq 30$ , min depth of coverage  $\geq 10$ ,  
510 maximum of missing data  $\leq 10$ , no InDel (small insertion or deletion), only bi-allelic sites and  
511 no site failing Hardy Weinberg equilibrium test ( $p < 10^{-6}$ ). The annotation of the variants was  
512 done using EPACTS and the variants included in the Gene-wise association analyses were  
513 non-synonymous, essential splice site, normal splice site, start loss, stop loss and stop gain  
514 variants. Logistic Score Test (“b.score” in S1 Table) was used to test single variant  
515 association ( $n_{\text{Cases}}=36$  ;  $n_{\text{Controls}}=107$  ;  $n_{\text{Variants}}=155,284$ ). For Gene-wise tests, we used two  
516 approaches (including  $n_{\text{Cases}}=36$  ;  $n_{\text{Controls}}=107$  and  $n_{\text{groups}}= 15,005$ ): (i) collapsing burden test  
517 using EMMAX (Efficient Mixed Model Association eXpedited (76), “CMC-EMMAX” in S1  
518 Table) and (ii) Optimal SNP-set sequence Kernel Association Test (“SKAT-O” in S1 Table).  
519 The advantage of the CMC-EMMAX is that this test is accounting for population structure  
520 and high relatedness between individual (based on kinship matrix). The advantage of SKAT is

521 that this test is particularly powerful in the presence of protective and deleterious variants and

522 null variants. For both Gene-wise tests, a  $10^{-6} \leq \text{MAF} \leq 0.05$  was used.

523



524 **Acknowledgements**

525 We would like to thank all the participants of the epidemiological and genetic cohorts, the  
526 “progeny” database, Julien Fumey for his R tutorial (<https://bioinfo-fr.net/creer-sa-carte-geographique-avec-r>) and Fabrice de Chaumont for his help with python.

528

## 529 **References**

- 530 1. Gillberg C. The ESSENCE in child psychiatry: Early Symptomatic Syndromes Eliciting  
531 Neurodevelopmental Clinical Examinations. *Res Dev Disabil.* 2010 Dec;31:1543–51.
- 532 2. Bourgeron T. From the genetic architecture to synaptic plasticity in autism spectrum  
533 disorder. *Nat Rev Neurosci.* 2015 Sep;16(9):551–63.
- 534 3. Mamidala MP, Kalikiri MK, Praveen Kumar PTV, Rajesh N, Vallamkonda OR, Rajesh  
535 V. Consanguinity in India and its association with autism spectrum disorder. *Autism Res*  
536 *Off J Int Soc Autism Res.* 2015 Apr;8(2):224–8.
- 537 4. Morrow EM, Yoo SY, Flavell SW, Kim TK, Lin Y, Hill RS, et al. Identifying autism  
538 loci and genes by tracing recent shared ancestry. *Science.* 2008 Jul 11;321:218–23.
- 539 5. Jorgensen TH, Degn B, Wang AG, Vang M, Gurling H, Kalsi G, et al. Linkage  
540 disequilibrium and demographic history of the isolated population of the Faroe Islands.  
541 *Eur J Hum Genet.* 2002 Jun;10:381–7.
- 542 6. Jorgensen TH, Buttenschon HN, Wang AG, Als TD, Borglum AD, Ewald H. The origin  
543 of the isolated population of the Faroe Islands investigated using Y chromosomal  
544 markers. *Hum Genet.* 2004 Jun;115:19–28.
- 545 7. Kocovska E, Biskupsto R, Carina Gillberg I, Ellefsen A, Kampmann H, Stora T, et al.  
546 The rising prevalence of autism: a prospective longitudinal study in the Faroe Islands. *J*  
547 *Autism Dev Disord.* 2012 Sep;42:1959–66.
- 548 8. Ellefsen A, Kampmann H, Billstedt E, Gillberg IC, Gillberg C. Autism in the Faroe  
549 Islands: an epidemiological study. *J Autism Dev Disord.* 2007 Mar;37:437–44.
- 550 9. Kocovska E, Billstedt E, Ellefsen A, Kampmann H, Gillberg IC, Biskupsto R, et al.  
551 Autism in the Faroe Islands: diagnostic stability from childhood to early adult life.  
552 *ScientificWorldJournal.* 2013;2013:592371.
- 553 10. Kočovská E, Biskupstø R, Carina Gillberg I, Ellefsen A, Kampmann H, Stóra T, et al.  
554 The rising prevalence of autism: a prospective longitudinal study in the Faroe Islands. *J*  
555 *Autism Dev Disord.* 2012 Sep;42(9):1959–66.
- 556 11. Iossifov I, O’Roak BJ, Sanders SJ, Ronemus M, Krumm N, Levy D, et al. The  
557 contribution of de novo coding mutations to autism spectrum disorder. *Nature.* 2014 Nov  
558 13;515:216–21.
- 559 12. Turner TN, Yi Q, Krumm N, Huddleston J, Hoekzema K, F. Stessman HA, et al.  
560 denovo-db: a compendium of human de novo variants. *Nucleic Acids Res.* 2017 Jan  
561 4;45(Database issue):D804–11.
- 562 13. Neale BM, Kou Y, Liu L, Ma’ayan A, Samocha KE, Sabo A, et al. Patterns and rates of  
563 exonic de novo mutations in autism spectrum disorders. *Nature.* 2012 May 10;485:242–  
564 5.

- 565 14. Kircher M, Witten DM, Jain P, O’Roak BJ, Cooper GM, Shendure J. A general  
566 framework for estimating the relative pathogenicity of human genetic variants. *Nat*  
567 *Genet.* 2014 Mar;46:310–5.
- 568 15. Abrahams BS, Arking DE, Campbell DB, Mefford HC, Morrow EM, Weiss LA, et al.  
569 SFARI Gene 2.0: a community-driven knowledgebase for the autism spectrum disorders  
570 (ASDs). *Mol Autism.* 2013;4:36.
- 571 16. Lek M, Karczewski KJ, Minikel EV, Samocha KE, Banks E, Fennell T, et al. Analysis  
572 of protein-coding genetic variation in 60,706 humans. *Nature.* 2016 18;536(7616):285–  
573 91.
- 574 17. Sanders SJ, He X, Willsey AJ, Ercan-Sencicek AG, Samocha KE, Cicek AE, et al.  
575 Insights into Autism Spectrum Disorder Genomic Architecture and Biology from 71  
576 Risk Loci. *Neuron.* 2015 Sep 23;87(6):1215–33.
- 577 18. Hempel M, Cremer K, Ockeloen CW, Lichtenbelt KD, Herkert JC, Denecke J, et al. De  
578 Novo Mutations in CHAMP1 Cause Intellectual Disability with Severe Speech  
579 Impairment. *Am J Hum Genet.* 2015 Sep 3;97(3):493–500.
- 580 19. Martin EA, Muralidhar S, Wang Z, Cervantes DC, Basu R, Taylor MR, et al. The  
581 intellectual disability gene *Kirrel3* regulates target-specific mossy fiber synapse  
582 development in the hippocampus. *eLife.* 2015 Nov 17;4:e09395.
- 583 20. Talkowski ME, Rosenfeld JA, Blumenthal I, Pillalamarri V, Chiang C, Heilbut A, et al.  
584 Sequencing chromosomal abnormalities reveals neurodevelopmental loci that confer risk  
585 across diagnostic boundaries. *Cell.* 2012 Apr 27;149(3):525–37.
- 586 21. Sanders SJ, Murtha MT, Gupta AR, Murdoch JD, Raubeson MJ, Willsey AJ, et al. De  
587 novo mutations revealed by whole-exome sequencing are strongly associated with  
588 autism. *Nature.* 2012 Apr 4;485:237–41.
- 589 22. Kalsner L, Twachtman-Bassett J, Tokarski K, Stanley C, Dumont-Mathieu T, Cotney J,  
590 et al. Genetic testing including targeted gene panel in a diverse clinical population of  
591 children with autism spectrum disorder: Findings and implications. *Mol Genet Genomic*  
592 *Med.* 2017 Dec 21;
- 593 23. Verhoeven K, Van Laer L, Kirschhofer K, Legan PK, Hughes DC, Schattelman I, et al.  
594 Mutations in the human alpha-tectorin gene cause autosomal dominant non-syndromic  
595 hearing impairment. *Nat Genet.* 1998 May;19(1):60–2.
- 596 24. Smith CEL, Poulter JA, Levin AV, Capasso JE, Price S, Ben-Yosef T, et al. Spectrum of  
597 PEX1 and PEX6 variants in Heimler syndrome. *Eur J Hum Genet EJHG.*  
598 2016;24(11):1565–71.
- 599 25. Wang Q, Charych EI, Pulito VL, Lee JB, Graziane NM, Crozier RA, et al. The  
600 psychiatric disease risk factors DISC1 and TNK1 interact to regulate synapse  
601 composition and function. *Mol Psychiatry.* 2011 Oct;16(10):1006–23.
- 602 26. Bourgeron T. A synaptic trek to autism. *Curr Opin Neurobiol.* 2009 Apr;19(2):231–4.

- 603 27. Bernier R, Golzio C, Xiong B, Stessman HA, Coe BP, Penn O, et al. Disruptive CHD8  
604 Mutations Define a Subtype of Autism Early in Development. *Cell*. 2014 Jul 3;
- 605 28. Gallagher L, Becker K, Kearney G, Dunlop A, Stallings R, Green A, et al. Brief report:  
606 A case of autism associated with del(2)(q32.1q32.2) or (q32.2q32.3). *J Autism Dev*  
607 *Disord*. 2003 Feb;33(1):105–8.
- 608 29. de Leeuw CA, Mooij JM, Heskes T, Posthuma D. MAGMA: generalized gene-set  
609 analysis of GWAS data. *PLoS Comput Biol*. 2015 Apr;11(4):e1004219.
- 610 30. Campellone KG, Webb NJ, Znameroski EA, Welch MD. WHAMM Is an Arp2/3  
611 Complex Activator That Binds Microtubules and Functions in ER to Golgi Transport.  
612 *Cell*. 2008 Jul 11;134(1):148–61.
- 613 31. Autism Spectrum Disorders Working Group of The Psychiatric Genomics Consortium.  
614 Meta-analysis of GWAS of over 16,000 individuals with autism spectrum disorder  
615 highlights a novel locus at 10q24.32 and a significant overlap with schizophrenia. *Mol*  
616 *Autism*. 2017;8:21.
- 617 32. Warner G, Moss J, Smith P, Howlin P. Autism characteristics and behavioural  
618 disturbances in ~ 500 children with Down’s syndrome in England and Wales. *Autism*  
619 *Res Off J Int Soc Autism Res*. 2014 Aug;7(4):433–41.
- 620 33. Vorstman JA, Morcus ME, Duijff SN, Klaassen PW, Heineman-de Boer JA, Beemer  
621 FA, et al. The 22q11.2 deletion in children: high rate of autistic disorders and early onset  
622 of psychotic symptoms. *J Am Acad Child Adolesc Psychiatry*. 2006 Sep;45:1104–13.
- 623 34. Niklasson L, Rasmussen P, Oskarsdottir S, Gillberg C. Autism, ADHD, mental  
624 retardation and behavior problems in 100 individuals with 22q11 deletion syndrome. *Res*  
625 *Dev Disabil*. 2009 Aug;30:763–73.
- 626 35. De Rubeis S, He X, Goldberg AP, Poultney CS, Samocha K, Cicek AE, et al. Synaptic,  
627 transcriptional and chromatin genes disrupted in autism. *Nature*. 2014 Nov 13;515:209–  
628 15.
- 629 36. Yan Y, Eipper BA, Mains RE. Kalirin-9 and Kalirin-12 Play Essential Roles in  
630 Dendritic Outgrowth and Branching. *Cereb Cortex N Y N 1991*. 2015 Oct;25(10):3487–  
631 501.
- 632 37. Russell TA, Grubisha MJ, Remmers CL, Kang SK, Forrest MP, Smith KR, et al. A  
633 Schizophrenia-Linked KALRN Coding Variant Alters Neuron Morphology, Protein  
634 Function, and Transcript Stability. *Biol Psychiatry*. 2018 Mar 15;83(6):499–508.
- 635 38. Hill JJ, Hashimoto T, Lewis DA. Molecular mechanisms contributing to dendritic spine  
636 alterations in the prefrontal cortex of subjects with schizophrenia. *Mol Psychiatry*.  
637 2006;11(6):557–66.
- 638 39. Qu B-X, Gong Y, Sinclair D, Fu M, Perl D, Diaz-Arrastia R. cPLA2 $\alpha$  knockout mice  
639 exhibit abnormalities in the architecture and synapses of cortical neurons. *Brain Res*.  
640 2013 Feb 25;1497:101–5.

- 641 40. Su L-D, Wang D-J, Yang D, Shen Y, Hu Y-H. Retrograde cPLA2 $\alpha$ /arachidonic acid/2-  
642 AG signaling is essential for cerebellar depolarization-induced suppression of excitation  
643 and long-term potentiation. *Cerebellum Lond Engl*. 2013 Jun;12(3):297–9.
- 644 41. Alvarez-Baron E, Michel K, Mittelstaedt T, Opitz T, Schmitz F, Beck H, et al. RIM3 $\gamma$   
645 and RIM4 $\gamma$  are key regulators of neuronal arborization. *J Neurosci Off J Soc Neurosci*.  
646 2013 Jan 9;33(2):824–39.
- 647 42. Dong S, Walker MF, Carriero NJ, DiCola M, Willsey AJ, Ye AY, et al. De novo  
648 insertions and deletions of predominantly paternal origin are associated with autism  
649 spectrum disorder. *Cell Rep*. 2014 Oct 9;9(1):16–23.
- 650 43. Iossifov I, Ronemus M, Levy D, Wang Z, Hakker I, Rosenbaum J, et al. De novo gene  
651 disruptions in children on the autistic spectrum. *Neuron*. 2012 Apr 26;74(2):285–99.
- 652 44. Kumar RA, Sudi J, Babatz TD, Brune CW, Oswald D, Yen M, et al. A de novo 1p34.2  
653 microdeletion identifies the synaptic vesicle gene RIMS3 as a novel candidate for  
654 autism. *J Med Genet*. 2010 Feb;47(2):81–90.
- 655 45. Uriu Y, Kiyonaka S, Miki T, Yagi M, Akiyama S, Mori E, et al. Rab3-interacting  
656 Molecule  $\gamma$  Isoforms Lacking the Rab3-binding Domain Induce Long Lasting Currents  
657 but Block Neurotransmitter Vesicle Anchoring in Voltage-dependent P/Q-type Ca<sup>2+</sup>  
658 Channels. *J Biol Chem*. 2010 Jul 9;285(28):21750–67.
- 659 46. Hjortshøj TD, Grønskov K, Brøndum-Nielsen K, Rosenberg T. A novel founder BBS1  
660 mutation explains a unique high prevalence of Bardet-Biedl syndrome in the Faroe  
661 Islands. *Br J Ophthalmol*. 2009 Mar;93(3):409–13.
- 662 47. Schwartz M, Sørensen N, Brandt NJ, Høgdall E, Holm T. High incidence of cystic  
663 fibrosis on the Faroe Islands: a molecular and genealogical study. *Hum Genet*. 1995  
664 Jun;95(6):703–6.
- 665 48. Thomsen JA, Lund AM, Olesen JH, Mohr M, Rasmussen J. Is L-Carnitine  
666 Supplementation Beneficial in 3-Methylcrotonyl-CoA Carboxylase Deficiency? *JIMD*  
667 *Rep*. 2015;21:79–88.
- 668 49. Santer R, Kinner M, Steuerwald U, Kjaergaard S, Skovby F, Simonsen H, et al.  
669 Molecular genetic basis and prevalence of glycogen storage disease type IIIA in the  
670 Faroe Islands. *Eur J Hum Genet EJHG*. 2001 May;9(5):388–91.
- 671 50. Ostergaard E, Duno M, Batbayli M, Vilhelmsen K, Rosenberg T. A novel MERTK  
672 deletion is a common founder mutation in the Faroe Islands and is responsible for a high  
673 proportion of retinitis pigmentosa cases. *Mol Vis*. 2011;17:1485–92.
- 674 51. Binzer S, Imrell K, Binzer M, Kyvik KO, Hillert J, Stenager E. High inbreeding in the  
675 Faroe Islands does not appear to constitute a risk factor for multiple sclerosis. *Mult Scler*  
676 *Houndmills Basingstoke Engl*. 2015 Jul;21(8):996–1002.
- 677 52. Lauritsen MB, Als TD, Dahl HA, Flint TJ, Wang AG, Vang M, et al. A genome-wide  
678 search for alleles and haplotypes associated with autism and related pervasive  
679 developmental disorders on the Faroe Islands. *Mol Psychiatry*. 2006 Jan;11:37–46.

- 680 53. Gregersen NO, Lescai F, Liang J, Li Q, Als T, Buttenschøn HN, et al. Whole-exome  
681 sequencing implicates DGKH as a risk gene for panic disorder in the Faroese population.  
682 *Am J Med Genet B Neuropsychiatr Genet.* 2016 Dec 1;171(8):1013–22.
- 683 54. Ewald H, Flint TJ, Jorgensen TH, Wang AG, Jensen P, Vang M, et al. Search for a  
684 shared segment on chromosome 10q26 in patients with bipolar affective disorder or  
685 schizophrenia from the Faroe Islands. *Am J Med Genet.* 2002 Mar 8;114:196–204.
- 686 55. Jamain S, Quach H, Betancur C, Rastam M, Colineaux C, Gillberg IC, et al. Mutations  
687 of the X-linked genes encoding neuroligins NLGN3 and NLGN4 are associated with  
688 autism. *Nat Genet.* 2003 May;34:27–9.
- 689 56. Durand CM, Betancur C, Boeckers TM, Bockmann J, Chaste P, Fauchereau F, et al.  
690 Mutations in the gene encoding the synaptic scaffolding protein SHANK3 are associated  
691 with autism spectrum disorders. *Nat Genet.* 2007 Jan;39:25–7.
- 692 57. Jamain S, Betancur C, Quach H, Philippe A, Fellous M, Giros B, et al. Linkage and  
693 association of the glutamate receptor 6 gene with autism. *Mol Psychiatry.* 2002;7:302–  
694 10.
- 695 58. Melke J, Goubran Botros H, Chaste P, Betancur C, Nygren G, Anckarsater H, et al.  
696 Abnormal melatonin synthesis in autism spectrum disorders. *Mol Psychiatry.* 2008  
697 Jan;13:90–8.
- 698 59. Ehlers S, Gillberg C, Wing L. A screening questionnaire for Asperger syndrome and  
699 other high-functioning autism spectrum disorders in school age children. *J Autism Dev*  
700 *Disord.* 1999 Apr;29(2):129–41.
- 701 60. Wing L, Leekam SR, Libby SJ, Gould J, Larcombe M. The Diagnostic Interview for  
702 Social and Communication Disorders: background, inter-rater reliability and clinical use.  
703 *J Child Psychol Psychiatry.* 2002 Mar;43(3):307–25.
- 704 61. Purcell S, Neale B, Todd-Brown K, Thomas L, Ferreira MAR, Bender D, et al. PLINK:  
705 A Tool Set for Whole-Genome Association and Population-Based Linkage Analyses.  
706 *Am J Hum Genet.* 2007 Sep;81(3):559–75.
- 707 62. Howrigan DP, Simonson MA, Keller MC. Detecting autozygosity through runs of  
708 homozygosity: a comparison of three autozygosity detection algorithms. *BMC*  
709 *Genomics.* 2011 Sep 23;12:460.
- 710 63. McQuillan R, Leutenegger A-L, Abdel-Rahman R, Franklin CS, Pericic M, Barac-Lauc  
711 L, et al. Runs of homozygosity in European populations. *Am J Hum Genet.* 2008  
712 Sep;83(3):359–72.
- 713 64. Gazal S, Sahbatou M, Perdry H, Letort S, Génin E, Leutenegger A-L. Inbreeding  
714 coefficient estimation with dense SNP data: comparison of strategies and application to  
715 HapMap III. *Hum Hered.* 2014;77(1–4):49–62.
- 716 65. Euesden J, Lewis CM, O’Reilly PF. PRSice: Polygenic Risk Score software. *Bioinforma*  
717 *Oxf Engl.* 2015 May 1;31(9):1466–8.

- 718 66. Garrison E, Marth G. Haplotype-based variant detection from short-read sequencing.  
719 ArXiv12073907 Q-Bio [Internet]. 2012 Jul 17 [cited 2017 Mar 15]; Available from:  
720 <http://arxiv.org/abs/1207.3907>
- 721 67. McKenna A, Hanna M, Banks E, Sivachenko A, Cibulskis K, Kernytsky A, et al. The  
722 Genome Analysis Toolkit: a MapReduce framework for analyzing next-generation DNA  
723 sequencing data. *Genome Res.* 2010 Sep;20(9):1297–303.
- 724 68. DeFreitas T, Saddiki H, Flaherty P. GEMINI: a computationally-efficient search engine  
725 for large gene expression datasets. *BMC Bioinformatics.* 2016;17:102.
- 726 69. Shannon P, Markiel A, Ozier O, Baliga NS, Wang JT, Ramage D, et al. Cytoscape: A  
727 Software Environment for Integrated Models of Biomolecular Interaction Networks.  
728 *Genome Res.* 2003 Jan 11;13(11):2498–504.
- 729 70. Wang K, Li M, Hadley D, Liu R, Glessner J, Grant SF, et al. PennCNV: an integrated  
730 hidden Markov model designed for high-resolution copy number variation detection in  
731 whole-genome SNP genotyping data. *Genome Res.* 2007 Nov;17:1665–74.
- 732 71. Colella S, Yau C, Taylor JM, Mirza G, Butler H, Clouston P, et al. QuantiSNP: an  
733 Objective Bayes Hidden-Markov Model to detect and accurately map copy number  
734 variation using SNP genotyping data. *Nucleic Acids Res.* 2007;35:2013–25.
- 735 72. Wang K, Li M, Hakonarson H. ANNOVAR: functional annotation of genetic variants  
736 from high-throughput sequencing data. *Nucleic Acids Res.* 2010 Sep;38:e164.
- 737 73. Fromer M, Purcell SM. Using XHMM Software to Detect Copy Number Variation in  
738 Whole-Exome Sequencing Data. *Curr Protoc Hum Genet.* 2014 Apr 24;81:7.23.1-21.
- 739 74. Lek M, Karczewski KJ, Minikel EV, Samocha KE, Banks E, Fennell T, et al. Analysis  
740 of protein-coding genetic variation in 60,706 humans. *Nature.* 2016 18;536(7616):285–  
741 91.
- 742 75. Su AI, Wiltshire T, Batalov S, Lapp H, Ching KA, Block D, et al. A gene atlas of the  
743 mouse and human protein-encoding transcriptomes. *Proc Natl Acad Sci U S A.* 2004  
744 Apr 20;101(16):6062–7.
- 745 76. Kang HM, Sul JH, Service SK, Zaitlen NA, Kong S-Y, Freimer NB, et al. Variance  
746 component model to account for sample structure in genome-wide association studies.  
747 *Nat Genet.* 2010 Apr;42(4):348–54.

748

749

750 **Funding**

751 This work was supported by the Institut Pasteur; Centre National de la Recherche  
752 Scientifique; the Assistance Publique – Hôpitaux de Paris; the University Paris Diderot; the  
753 Simons Foundation; the Fondation pour la Recherche Médicale [DBI20141231310]; the  
754 European Commission Horizon 2020 [COSYN]; The human brain project; the European  
755 Commission Innovative Medicines Initiative [EU-AIMS no. 115300]; the Cognacq-Jay  
756 foundation; the Bettencourt-Schueller foundation; the Orange foundation; the FondaMental  
757 foundation; the Conny-Maeva foundation; and the Agence Nationale de la Recherche (ANR)  
758 [SynPathy]. This research was supported by the Laboratory of Excellence GENMED  
759 (Medical Genomics) grant no. ANR-10-LABX-0013, Bio-Psy and by the INCEPTION  
760 program ANR-16-CONV-0005, all managed by the ANR part of the Investment for the  
761 Future program. The funders had no role in study design, data collection and analysis,  
762 decision to publish, or preparation of the manuscript.

763



## 764 **Figure Captions**

765 **Fig 1. Genetic background of the Faroese population.** A. Geographic localization of the  
766 Faroe Islands (R software and “maps” and “mapdata” packages were used to draw the map).  
767 B. Demographic comparison of the epidemiological and genetic cohorts of the Faroe Islands.  
768 The epidemiological and the genetic cohort are composed of 67 and 36 individuals with  
769 autism, respectively. C. Multidimensional scaling plots (MDS) of genome-wide identity by  
770 state (IBS) pairwise distances between human populations. Each dot represents an individual  
771 and the distance between two dots corresponds to genetic distance based on genome-wide  
772 pairwise IBS calculations. D. Degree of inbreeding across HapMap 3 and Faroese  
773 populations. The inbreeding coefficients of the Faroe non-autism control individuals (n=176)  
774 were compared to the HapMap3 populations. Faroe individuals displayed a higher degree of  
775 inbreeding compared with others human populations (Median F:  $F_{\text{FAROES}} = 0.015$ ;  
776  $F_{\text{ASW}} = 0.0014$ ;  $F_{\text{CEU}} = 0.0071$ ;  $F_{\text{CHD}} = 0.0081$ ;  $F_{\text{CHB}} = 0.0083$ ;  $F_{\text{GIH}} = 0.011$ ;  $F_{\text{JPT}} = 0.0093$ ;  
777  $F_{\text{LWK}} = 0.0045$ ;  $F_{\text{MXL}} = 0.0095$ ;  $F_{\text{MKK}} = 0.0026$ ;  $F_{\text{TSI}} = 0.0066$ ;  $F_{\text{YRI}} = 0.0028$ ; Paired samples  
778 Wilcoxon test:  $W_{\text{ASW}} = 12.56$ ,  $p_{\text{ASW}} < 0.0001$ ;  $W_{\text{CEU}} = 12.27$ ,  $p_{\text{CEU}} < 0.0001$ ;  $W_{\text{CHD}} = 7.14$ ,  
779  $p_{\text{CHD}} < 0.0001$ ;  $W_{\text{CHB}} = 7.11$ ,  $p_{\text{CHB}} < 0.0001$ ;  $W_{\text{GIH}} = -3.06$ ,  $p_{\text{GIH}} < 0.002$ ;  $W_{\text{JPT}} = -5.83$ ,  
780  $p_{\text{JPT}} < 0.0001$ ;  $W_{\text{LWK}} = -10.86$ ,  $p_{\text{LWK}} < 0.0001$ ;  $W_{\text{MXL}} = -5.66$ ,  $p_{\text{MXL}} < 0.0001$ ;  $W_{\text{MKK}} = -14.52$ ,  
781  $p_{\text{MKK}} < 0.0001$ ;  $W_{\text{TSI}} = -8.64$ ,  $p_{\text{TSI}} < 0.0001$ ;  $W_{\text{YRI}} = -14.41$ ,  $p_{\text{YRI}} < 0.0001$ ;  $p$  are nominal  $p$ -  
782 values,  $*p < 0.05$ ,  $**p < 0.01$ ,  $***p < 0.001$ ). N, number; ID, intellectual disability; ASW,  
783 African ancestry in Southwest USA (n=83); CEU, Utah residents with Northern and Western  
784 European ancestry from the CEPH collection (n=165); CHB, Han Chinese in Beijing, China  
785 (n=84); CHD, Chinese in Metropolitan Denver, Colorado (n=85); GIH, Gujarati Indians in  
786 Houston, Texas (n=88); JPT, Japanese in Tokyo, Japan (n=86); LWK, Luhya in Webuye,  
787 Kenya (n=90); MXL, Mexican ancestry in Los Angeles (n=77), California; MKK, Maasai in

788 Kinyawa, Kenya (n=171); TSI, Toscani in Italia (n=88); YRI, Yoruba in Ibadan, Nigeria  
789 (n=167).

790

791 **Fig 2. Rare and common variants in Faroese individuals with autism.** A. Copy-number  
792 variant (CNV) analysis among gene-set lists within Faroe individuals. The number of exonic  
793 CNV carriers altering any genes or gene-set lists (SFARI genes, pLI > 0.9 genes and Brain  
794 genes, see Materials and Methods section) were compared between individuals with autism,  
795 siblings and controls (Fisher's exact test:  $n_{\text{autism}} = 36$ ,  $n_{\text{controls}} = 107$ ,  $p_{\text{CNV\_loss\_All\_genes}} = 0.02$ ,  
796  $\text{OR}_{\text{CNV\_loss\_All\_genes}} = 2.79$ ;  $p_{\text{CNV\_loss\_SFARI}} = 0.014$ ,  $\text{OR}_{\text{CNV\_loss\_All\_SFARI}} = 13.25$ ;  
797  $p_{\text{CNV\_loss\_pLI>0.9}} = 0.014$ ,  $\text{OR}_{\text{CNV\_loss\_pLI>0.9}} = 13.25$ ;  $p_{\text{CNV\_loss\_Brain}} = 0.024$ ,  
798  $\text{OR}_{\text{CNV\_loss\_All\_Brain}} = 5.59$ ;  $p_{\text{CNV\_gain\_All\_genes}} = 0.0056$ ,  $\text{OR}_{\text{CNV\_gain\_All\_genes}} = 3.28$ ;  
799  $p_{\text{CNV\_gain\_SFARI}} = 0.067$ ,  $\text{OR}_{\text{CNV\_gain\_All\_SFARI}} = 4.33$ ;  $p_{\text{CNV\_gain\_pLI>0.9}} = 0.11$ ,  
800  $\text{OR}_{\text{CNV\_gain\_pLI>0.9}} = 2.47$ ;  $p_{\text{CNV\_gain\_Brain}} = 0.0049$ ,  $\text{OR}_{\text{CNV\_gain\_All\_Brain}} = 4.76$ ;  $p$  are nominal  $p$ -  
801 values). B. Heatmap combining signals obtained from rare and common variant association  
802 tests and rare deleterious variants altering SFARI genes throughout Faroese individuals with  
803 autism. "Burden of non-synonymous" includes results from SKAT-O and CMC-EMMAX  
804 obtained from WES data (see Materials and Methods section and S5 fig;  $p < 10^{-3}$ ). "Common  
805 variants" are the top hits of the genome wide association study (GWAS) for both allelic and  
806 recessive model obtained from genome-wide genotyping data ( $p < 10^{-6}$ ). "Rare LGD SFARI  
807 variants" are rare likely gene disrupting (LGD) variants altering SFARI genes identified by  
808 (MAF < 1% in gnomAD). "The controls freq." column indicates the proportion of non-ASD  
809 Faroese controls carrying the corresponding variant. P-Values are nominal. ID, intellectual  
810 disability.

811

812 **Fig 3. Genetic recessive mutations in Faroese individuals with autism.** A. Distribution of  
813 the inbreeding coefficient in Faroese individuals (Mann Whitney U-test:  $n_{\text{autisms}} = 36$ ,

814  $n_{\text{controls}} = 176$ ,  $n_{\text{siblings}} = 30$ ;  $U_{\text{controls.vs.autisms}} = 2,297$ ,  $p_{\text{controls.vs.autisms}} = 0.0047$ ;  
815  $U_{\text{controls.vs.siblings}} = 1,953$ ,  $p_{\text{controls.vs.siblings}} = 0.011$ ; \* indicates the one withstanding multiple  
816 testing). B. Number of rare LGD+MIS30 homozygous mutations carried per individual (Mann  
817 Whitney U-test:  $n_{\text{autisms}} = 36$ ,  $n_{\text{controls}} = 107$ ,  $n_{\text{siblings}} = 30$ ;  $U_{\text{controls.vs.autisms}} = 1,321$ ,  
818  $p_{\text{controls.vs.autisms}} = 0.00049$ ;  $U_{\text{controls.vs.siblings}} = 1,293$ ,  $p_{\text{controls.vs.siblings}} = 0.025$ ; \* indicates the one  
819 withstanding multiple testing). C. Venn diagram of the genes carrying the variants from B.  
820 Genes names are in bold and annotated when they are part of our gene-set lists (SFARI genes,  
821 pLI > 0.9 genes and Brain genes, see subject and methods section). The plot on the right shows  
822 the proportion of individuals in each category carrying at least one mutated gene in our gene-  
823 sets lists (Fisher's exact test:  $p_{\text{controls.vs.autisms}} = 0.03$ ;  $p_{\text{controls.vs.siblings}} = 0.03$ ). D. and E. are  
824 describing two specific families carrying multiple variants. "0" and "1" refer to wildtype or  
825 mutated allele, respectively. The localizations of the variants are indicated along the proteins  
826 and alignments throughout species showed the strong conservation of the altered amino acids.  
827 LGD, likely gene disruptive; MIS30, missense variants with CADD score  $\geq 30$ ; IgD,  
828 immunoglobulin domain; TIL, Trypsin Inhibitor-like; FA5/8C, Coagulation factor 5/8 type C  
829 domain; LamG, Laminin G domain; EGF, epidermal growth factor like domain; Fibr.,  
830 Fibrinogen, alpha/beta/gamma chain, C-terminal globular domain; AAA: ATPases associated  
831 domains.

832

833 **Fig 4. Distribution of the polygenic risk score for autism in Faroese individuals. A.**

834 Distribution of the polygenic risk score for autism (PRS-autism) of controls, autisms and  
835 siblings (Mann Whitney U-test:  $n_{\text{autisms}} = 36$ ,  $n_{\text{controls}} = 107$ ,  $n_{\text{siblings}} = 53$ ;

836  $U_{\text{controls.vs.autisms}} = 2,344$ ,  $p_{\text{controls.vs.autisms}} = 0.0070$ ; \* indicates the one withstanding multiple

837 testing). B. Distribution of the PRS-autism for the cases without intellectual disability (ID)

838 and the cases with ID (Mann Whitney U-test:  $n_{\text{autisms-with-ID}} = 12$ ,  $n_{\text{autisms-without-ID}} = 24$ ;  $U_{\text{ID.vs.no-}}$

839 ID = 86,  $p_{ID.vs.no-ID} = 0.027$ ; \* indicates the one withstanding multiple testing). The PRS was  
840 calculated using PRSice-2 (see Materials and Methods section).

841

842 **Fig 5. Stratification of autism in Faroese individuals.** On the left, the stratification was built  
843 using hierarchical clustering on the number of genes carrying rare deleterious variants altering  
844 SFARI genes (MIS30, LGD or CNV) and on the polygenic risk score for autism (PRS-autism).  
845 The other columns were not used for the clustering. The genetic profile contains variants with  
846 a predicted impact on the condition of the individual with autism, the one in bold are most likely  
847 causatives. The clinical profile gives a subset of relevant information for each individual with  
848 autism. ID, intellectual disability; M, male; F, female; del, deletion; dup, duplication.

849

850

## 851 **Supporting information**

852 **S1 Fig 1. Pipeline of the study.** QC, quality control; SD LRR, standard deviation of the Log  
853 R ratio; SD BAF, standard deviation of the B allele frequency; |WF|, absolute value of the  
854 wave factor; BWA, Burrows-Wheeler Aligner; GATK, Genome Analysis Toolkit; VEP,  
855 Variant Effect Predictor; GQ, genotyping quality; Htz\_R, heterozygosity ratio; CNV, copy  
856 number variant; SNP/V, single nucleotide polymorphism/variation; WES, whole exome  
857 sequencing; Hmz, homozygote; Htz, heterozygote; pLI, probability of being loss-of function  
858 intolerant.

859

860 **S2 Fig. Population stratification of the Faroe Islands.** Combination of the ethnic genetic  
861 background for each individuals of the Faroe and the individuals from HapMap3 using  
862 admixture. Legend of HapMap 3 population: Africa (ASW, African ancestry in Southwest  
863 USA (n=83); LWK, Luhya in Webuye, Kenya (n=90); MKK, Maasai in Kinyawa, Kenya  
864 (n=171); YRI, Yoruba in Ibadan, Nigeria (n=167)); Asia (CHB, Han Chinese in Beijing,  
865 China (n=84); CHD, Chinese in Metropolitan Denver, Colorado (n=85); JPT, Japanese in  
866 Tokyo, Japan (n=86)); TSI, Toscani in Italia (n=88); CEU, Utah residents with Northern and  
867 Western European ancestry from the CEPH collection (n=165); GIH, Gujarati Indians in  
868 Houston, Texas (n=88); MXL, Mexican ancestry in Los Angeles (n=77), California.

869

870 **S3 Fig. CNVs altering genes involved in neurodevelopmental disorders.** A. *De novo*  
871 Trisomy 21 in patient with autism, ID and Down syndrome. B. *De novo* deletion of 425.5 kb  
872 removing the six first exons of the *NRXN1α* in individual with autism. C. *De novo* 2.9 Mb  
873 deletion on chromosome 22q11 in individual with autism and DiGeorge/velocardial  
874 syndrome. D. A 91.4 kb deletion removing all exons of *ADNP* in a male with autism and ID.  
875 Each dot shows Log R Ratio (LRR; in red) and B allele frequency (BAF; in green). The copy

876 number (CN) is indicated with a blue line. Patients with ID and patients without ID are  
877 represented in black and grey, respectively. ID, Intellectual disability.

878

879 **S4 Fig. The *de novo* SNVs in individuals with autism.** Sanger sequencing was performed to  
880 validate *de novo* SNVs altering *MECP2*, *KIF17* (A), *PLA2G4A* (B), *RIMS4* (C) and *KALRN*  
881 (D). Sanger chromatograms are shown for each trios. Individuals with ID and without ID are  
882 represented in black and grey, respectively. The position of the SNVs is indicated on the  
883 protein and the amino acid alignment of the region throughout several species (Human,  
884 Rhesus, Mouse, Dog, Zebrafish) shows the high conservation of the altered amino acids; ID,  
885 Intellectual disability.

886

887 **S5 Fig. Gene-wise association study using the whole exome sequencing data.** To test for  
888 Gene-wise association, a collapsing burden test using EMMAX “CMC-EMMAX” (A) and  
889 optimal SNP-set sequence Kernel Association Test “SKAT-O” (B) were used. The dashed  
890 line indicates  $p\text{-value} < 10^{-3}$ . EMMAX, Efficient Mixed Model Association eXpedited.

891

892 **S6 Fig. Results from the Genome Wide Association Study (GWAS) using different**  
893 **models (allelic, Recessive or Dominant).** QQ plots and Manhattan plots for allelic, recessive  
894 and dominant GWAS are represented in panel A and B, respectively. QQ, quantile-quantile.

895

896 **S7 Fig. Locus zoom of the top hits detected by the GWAS.** LocusZoom for regional  
897 visualization of the top hits isolated from the allelic and recessive GWAS was used.

898

899 **S1 Appendix. Clinical notes**

900

- 901 **S1 Table: *de novo* CNVs**
- 902 **S2 Table: *de novo* SNVs**
- 903 **S3 Table: CNVs within SFARI, pLI > 0.9 an Brain genes**
- 904 **S4 Table: CMC-emmax gene-wise association test from WES**
- 905 **S5 Table: SKAT-O gene-wise association test from WES**
- 906 **S6 Table: b.score single variant association test from WES**
- 907 **S7 Table: rare LGD or MIS30 SNV within SFARI, pLI and Brain genes (< 1%**
- 908 **gnomAD)**
- 909 **S8 Table: recessive SNVs**
- 910 **S9 Table: GWAS from SNP genotyping data**
- 911 **S10 Table: MAGMA Gene-based association study from SNP genotyping data**
- 912 **S11 Table: MAGMA Gene-set-based association study from SNP genotyping data**

| Patient  | ID | Sex | PRS-autism | SFARI |
|----------|----|-----|------------|-------|
| PN400100 | ●  | M   |            |       |
| PN400528 | ●  | F   |            |       |
| PN400113 | ●  | M   |            |       |
| PN400559 | ●  | M   |            |       |
| PN400132 | ●  | M   |            |       |
| PN400533 | ●  | F   |            |       |
| PN400179 | ●  | M   |            |       |
| PN400129 | ●  | M   |            |       |
| PN400108 | ●  | M   |            |       |
| PN400119 | ●  | F   |            |       |
| PN400128 | ●  | M   |            |       |
| PN400115 | ●  | M   |            |       |
| PN400133 | ●  | M   |            |       |
| PN400114 | ●  | M   |            |       |
| PN400534 | ●  | F   |            |       |
| PN400111 | ●  | M   |            |       |
| PN400532 | ●  | F   |            |       |
| PN400144 | ●  | M   |            |       |
| PN400575 | ●  | F   |            |       |
| PN400137 | ●  | M   |            |       |
| PN400124 | ●  | M   |            |       |
| PN400531 | ●  | F   |            |       |
| PN400102 | ●  | M   |            |       |
| PN400116 | ●  | M   |            |       |
| PN400117 | ●  | M   |            |       |
| PN400104 | ●  | M   |            |       |
| PN400579 | ●  | M   |            |       |
| PN400166 | ●  | M   |            |       |
| PN400121 | ●  | F   |            |       |
| PN400530 | ●  | M   |            |       |
| PN400103 | ●  | M   |            |       |
| PN400182 | ●  | M   |            |       |
| PN400127 | ●  | M   |            |       |
| PN400587 | ●  | M   |            |       |
| PN400118 | ●  | M   |            |       |
| PN400125 | ●  | M   |            |       |

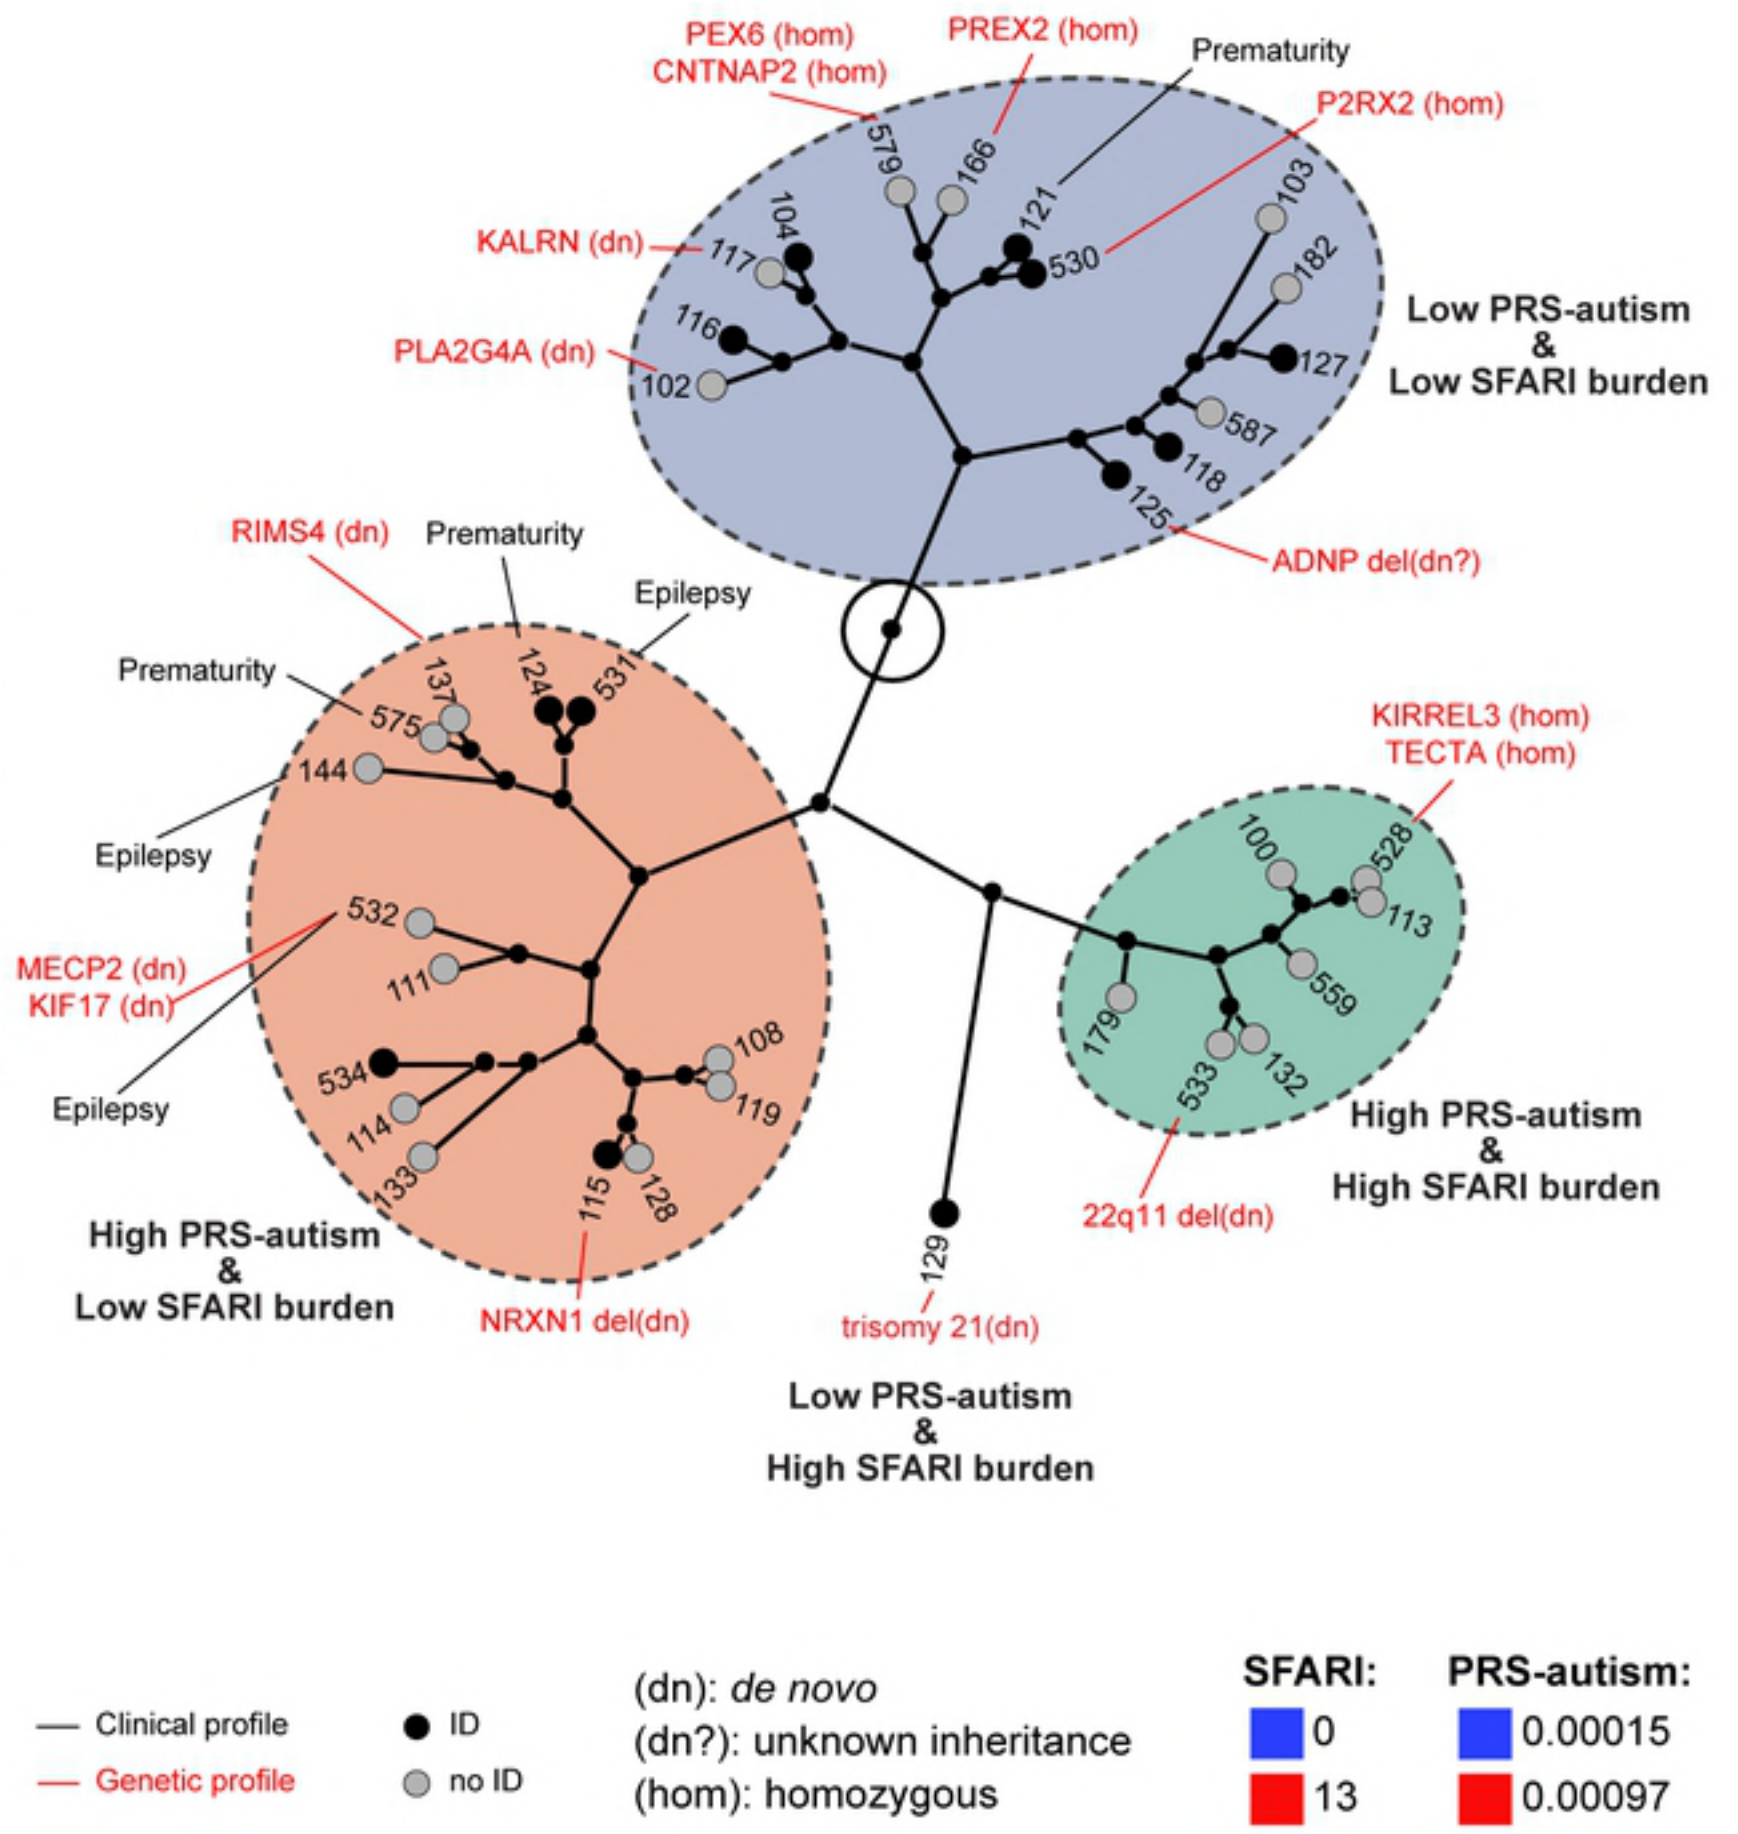



A

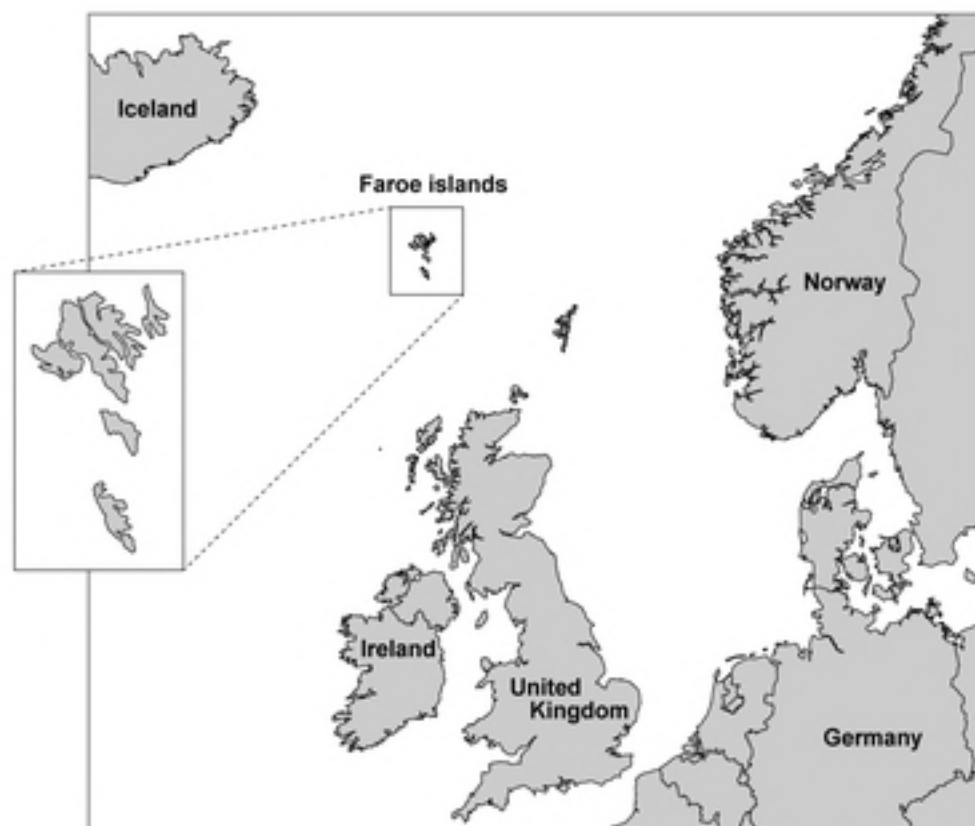

B

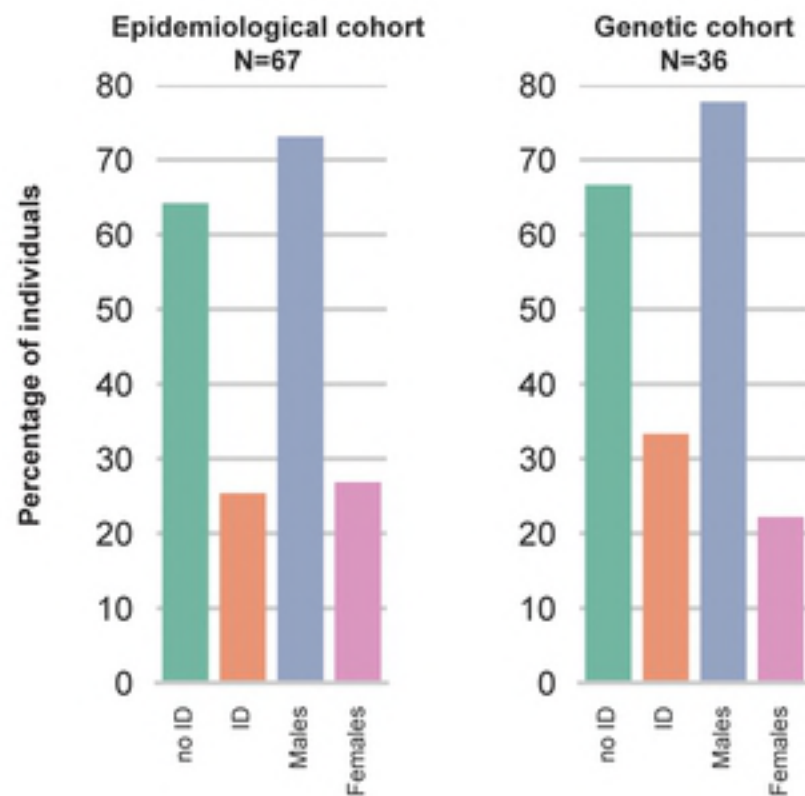

C

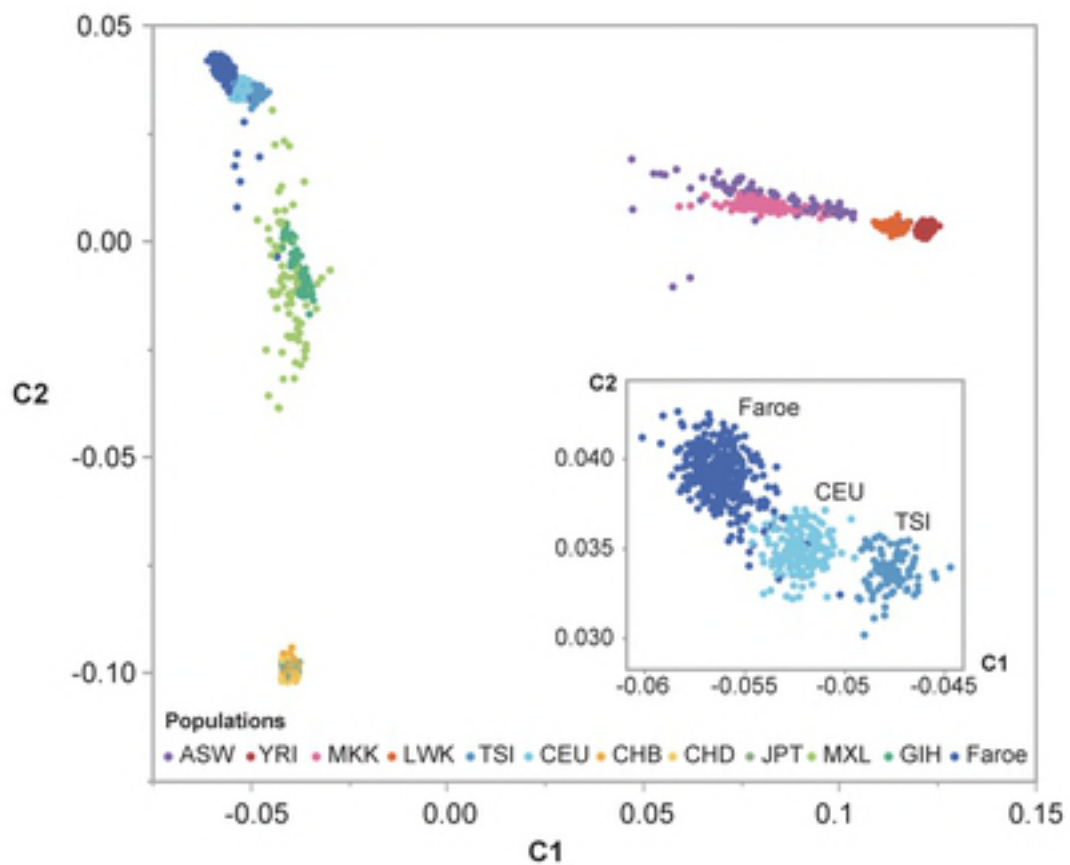

D

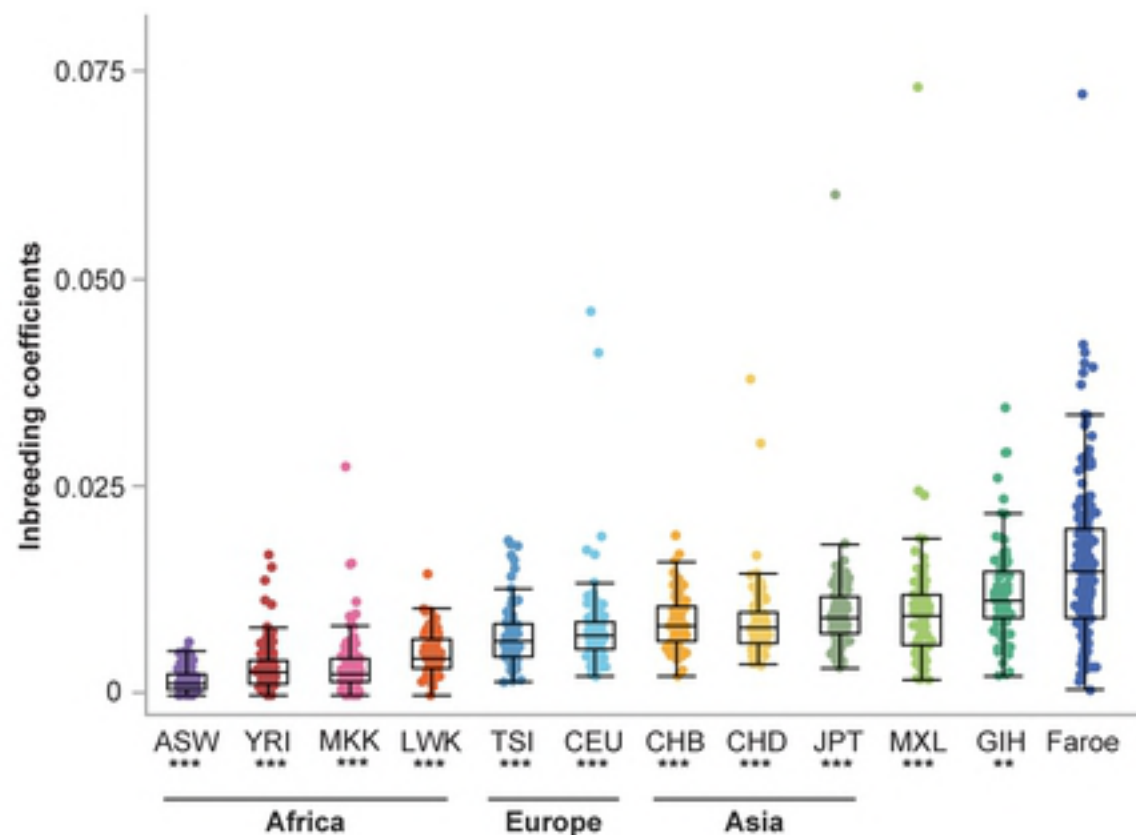

**A**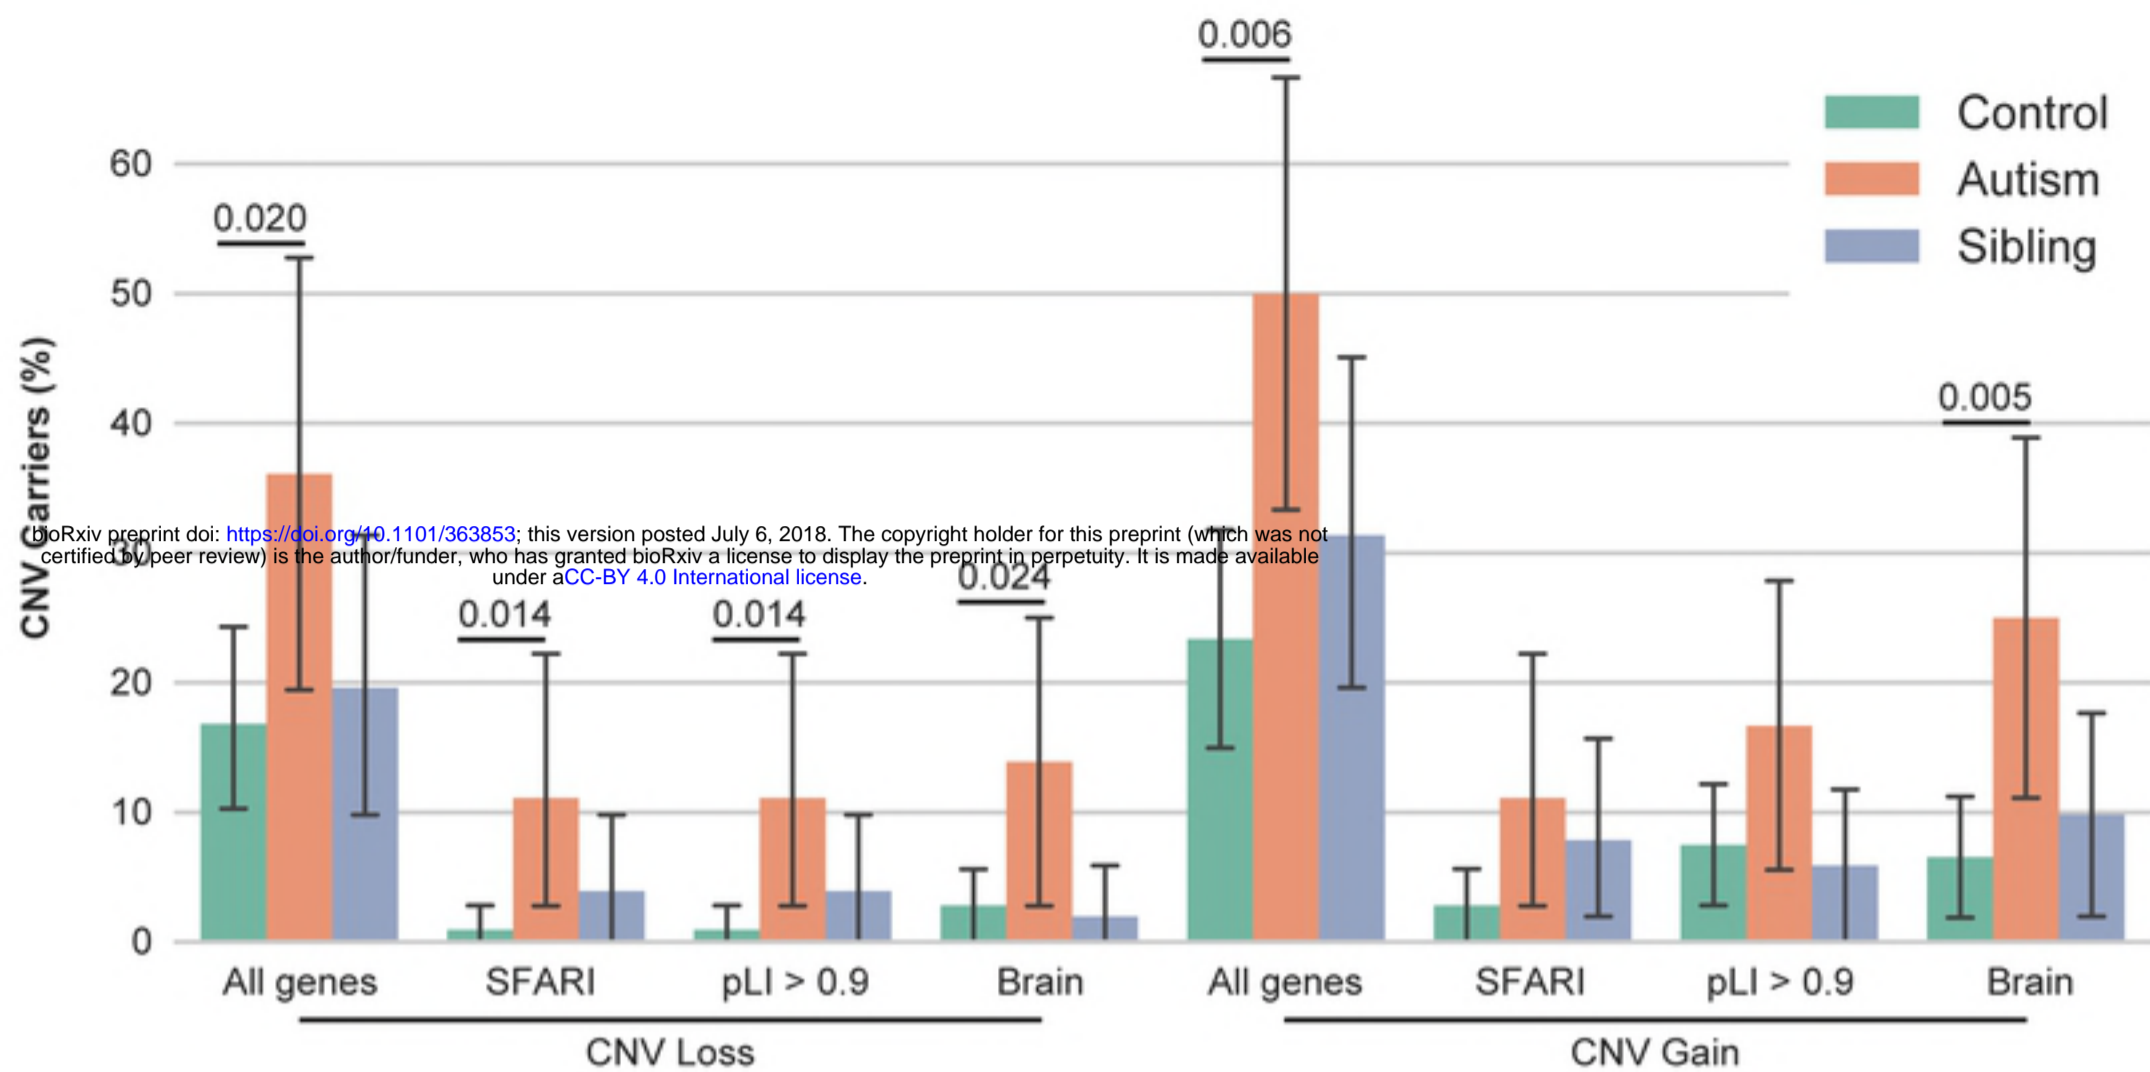**B**

Burden of non-synonymous

Rare LGD SFARI variants

Common variants

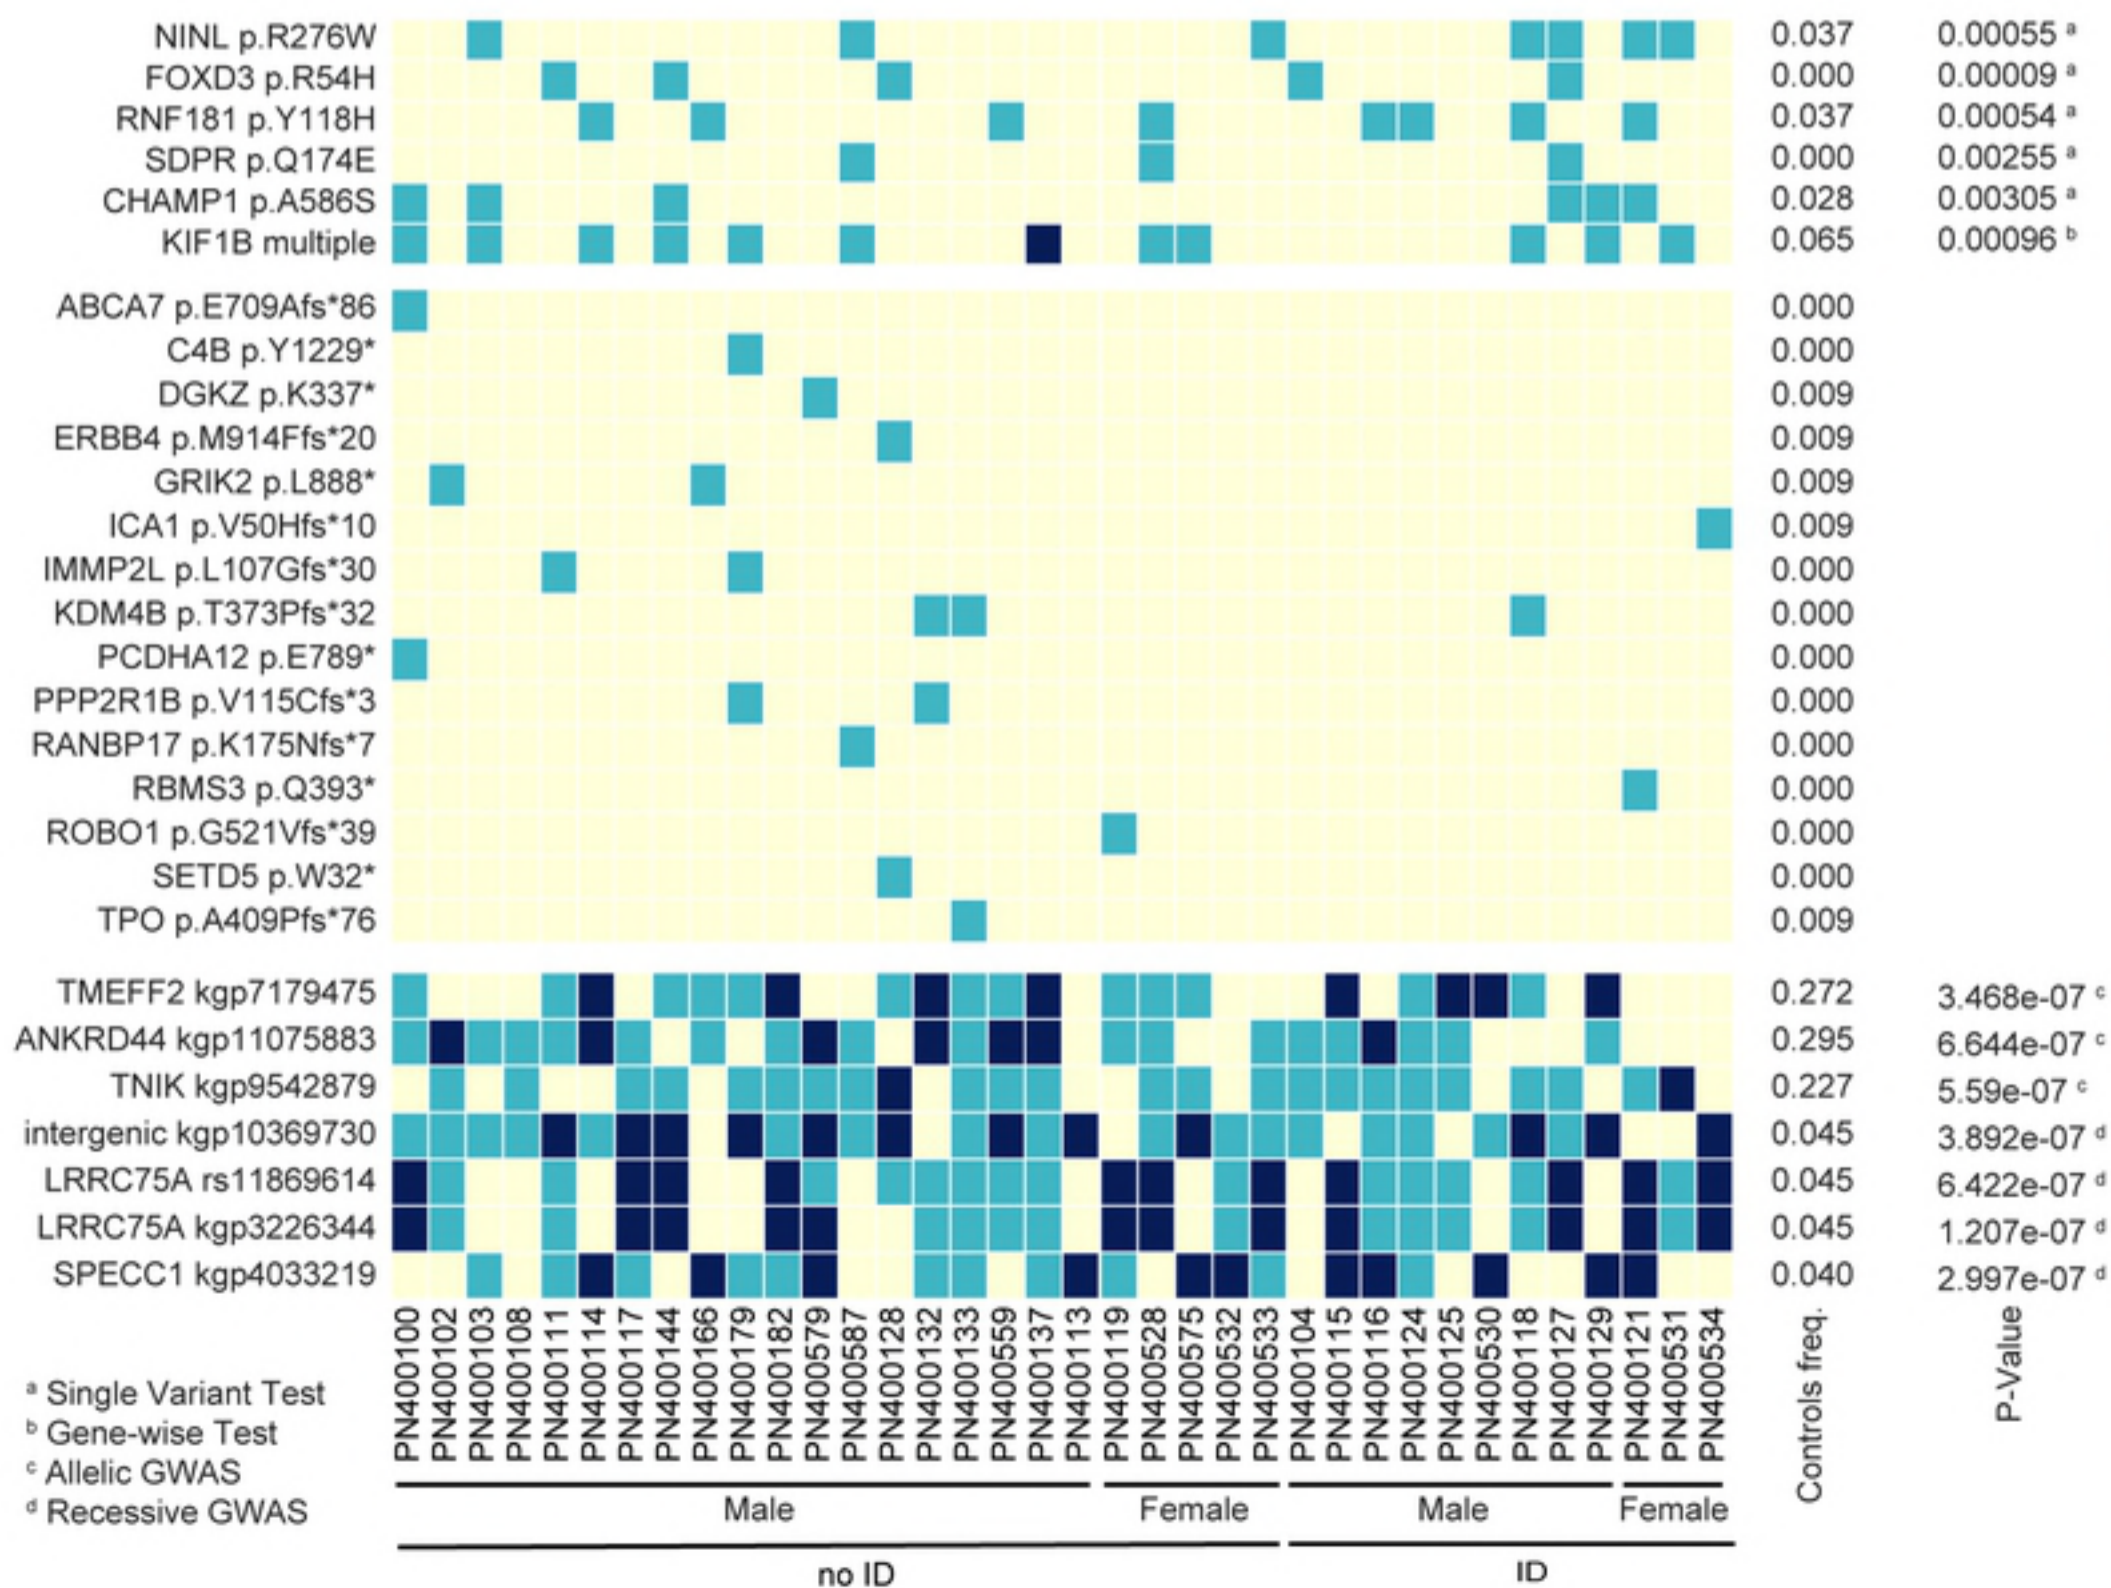

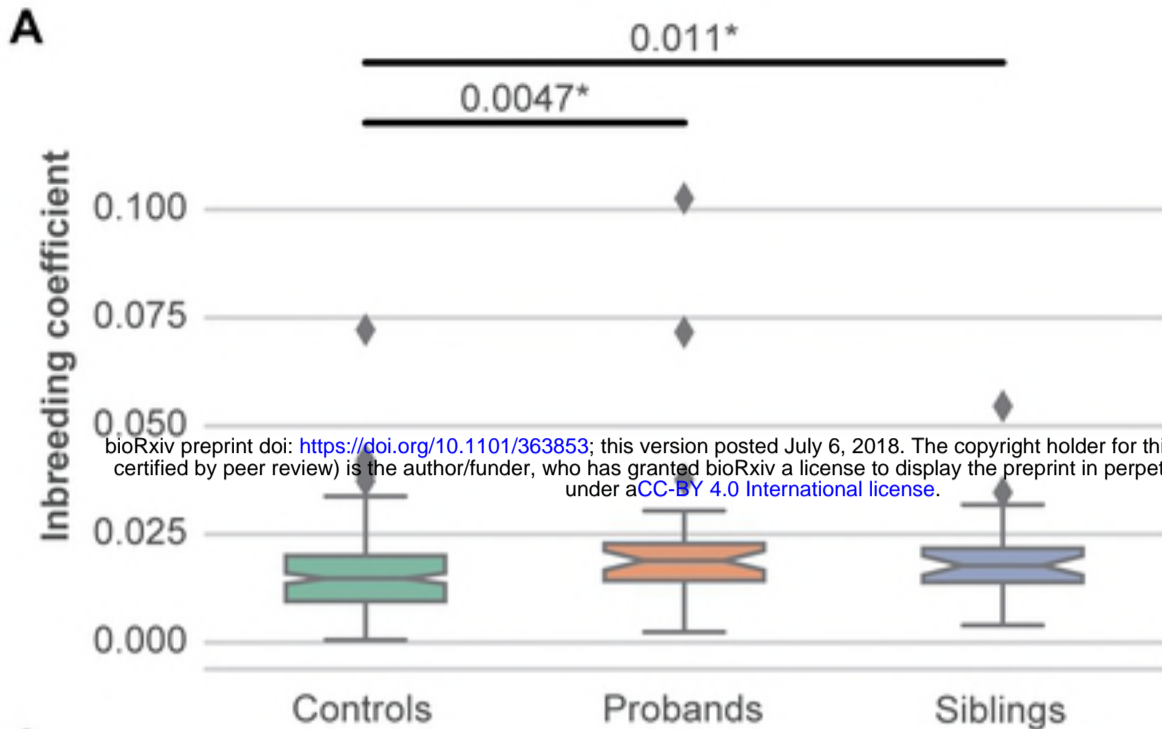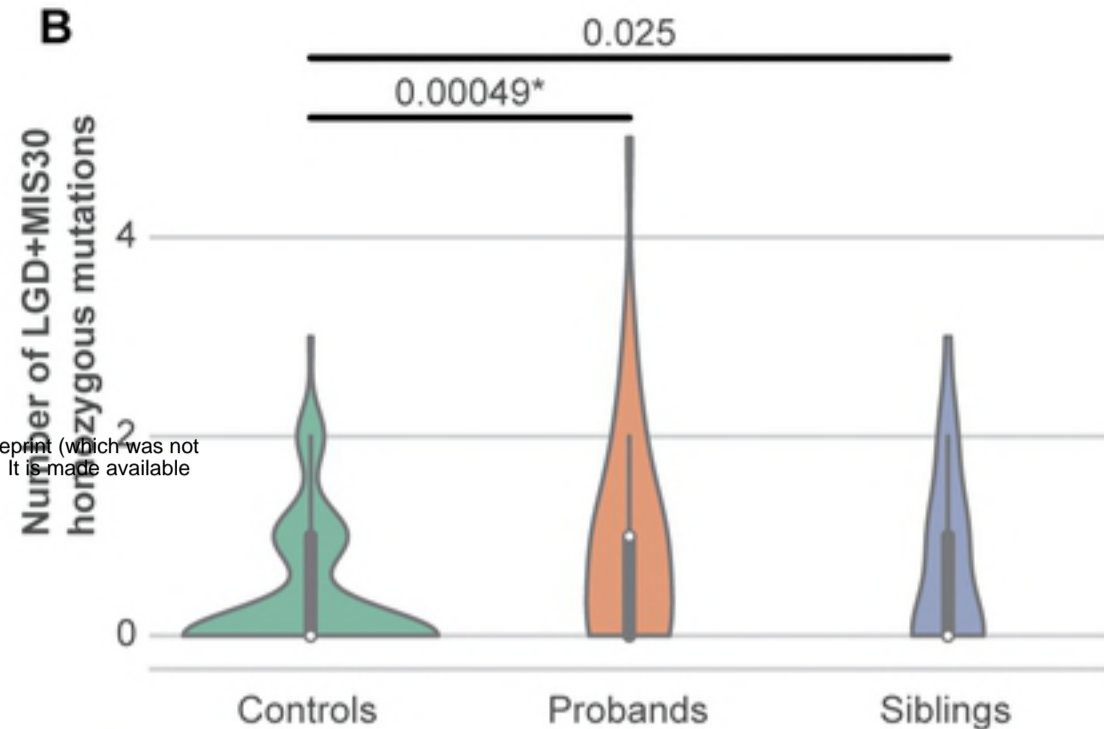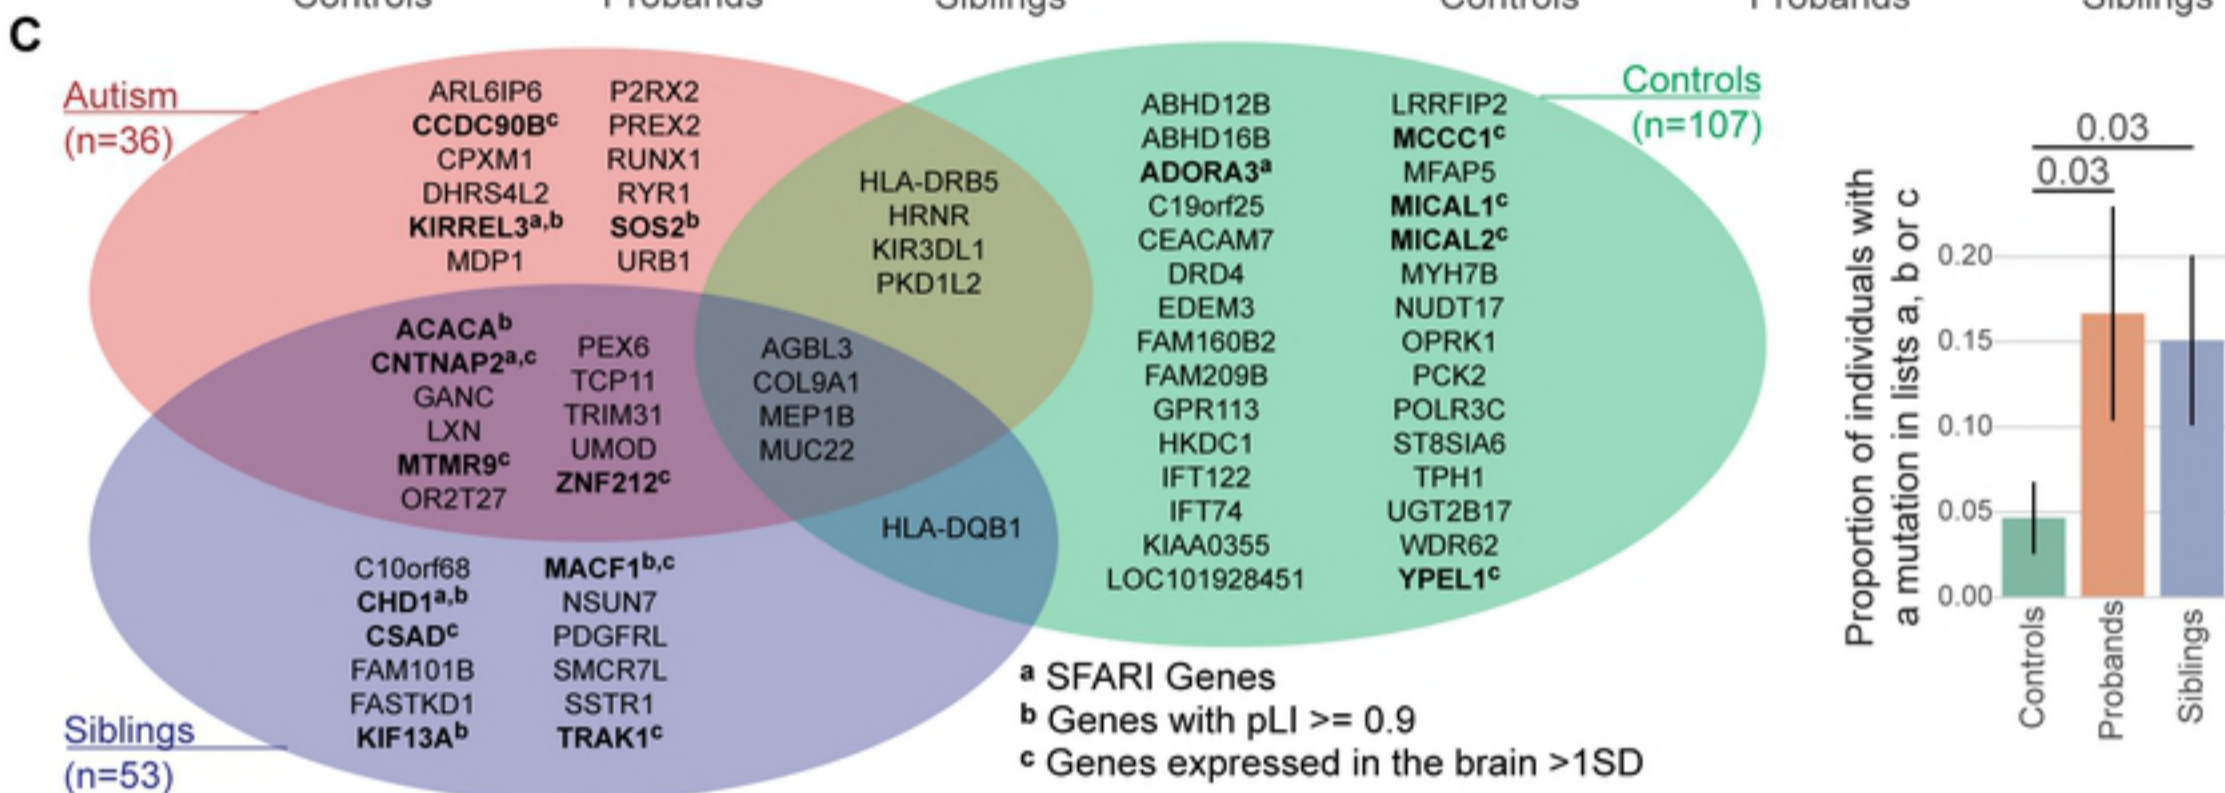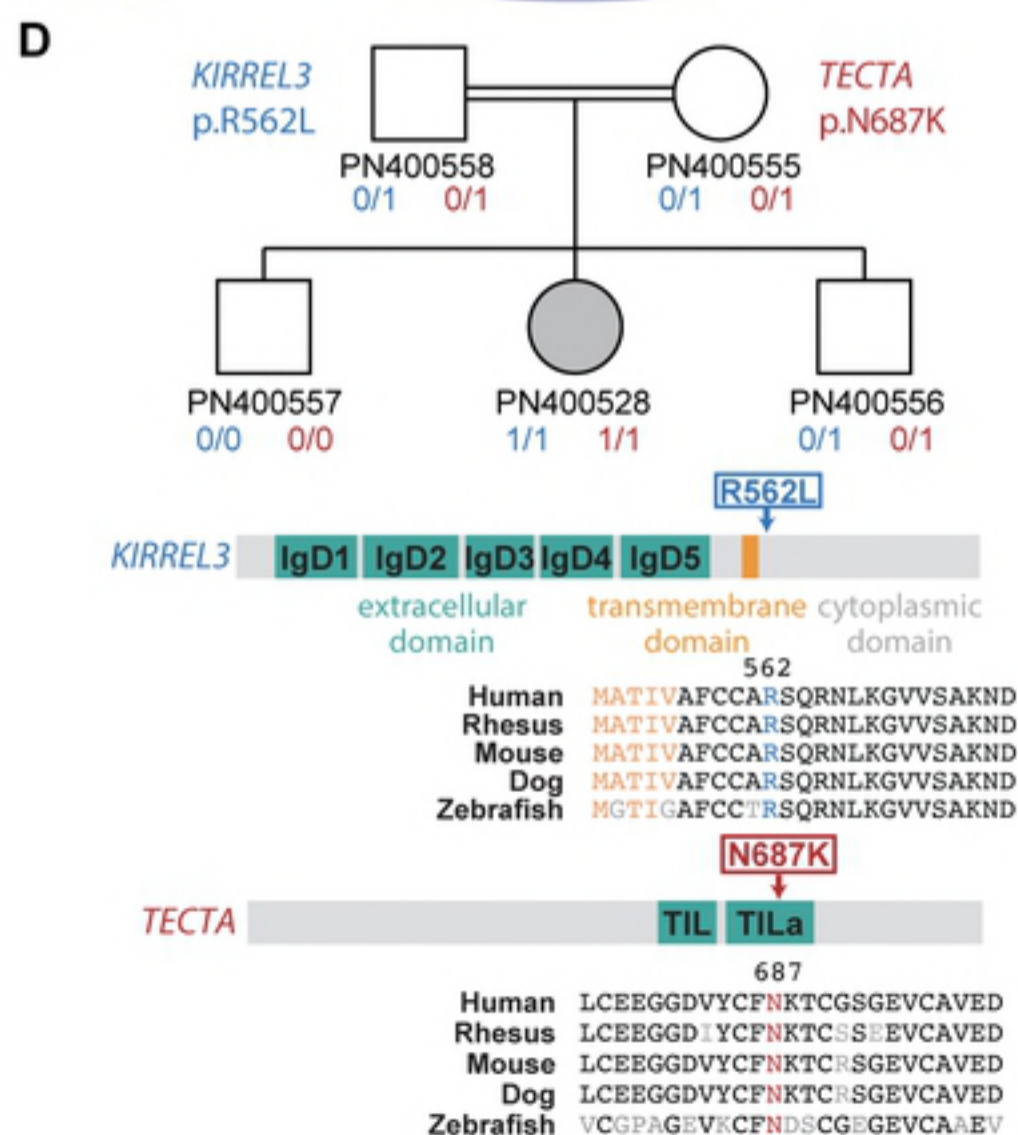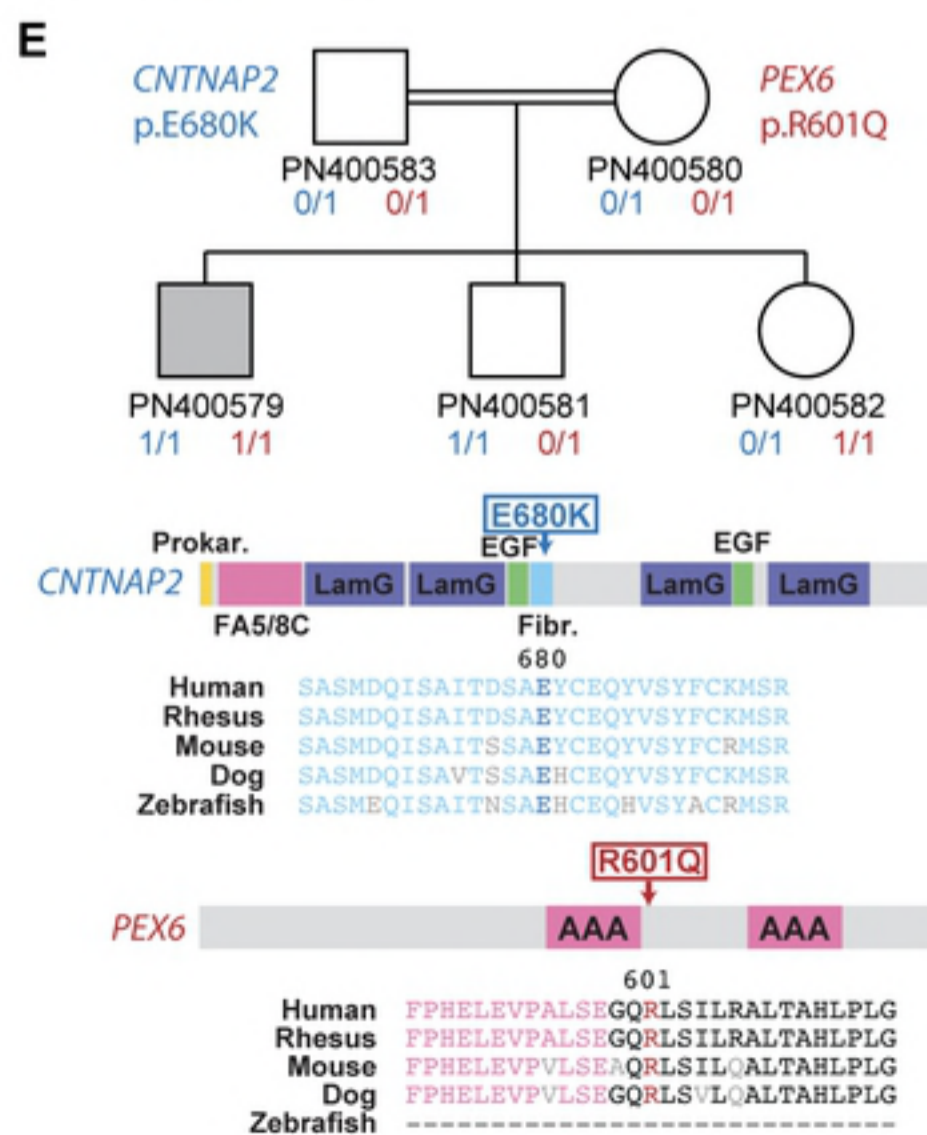

**A**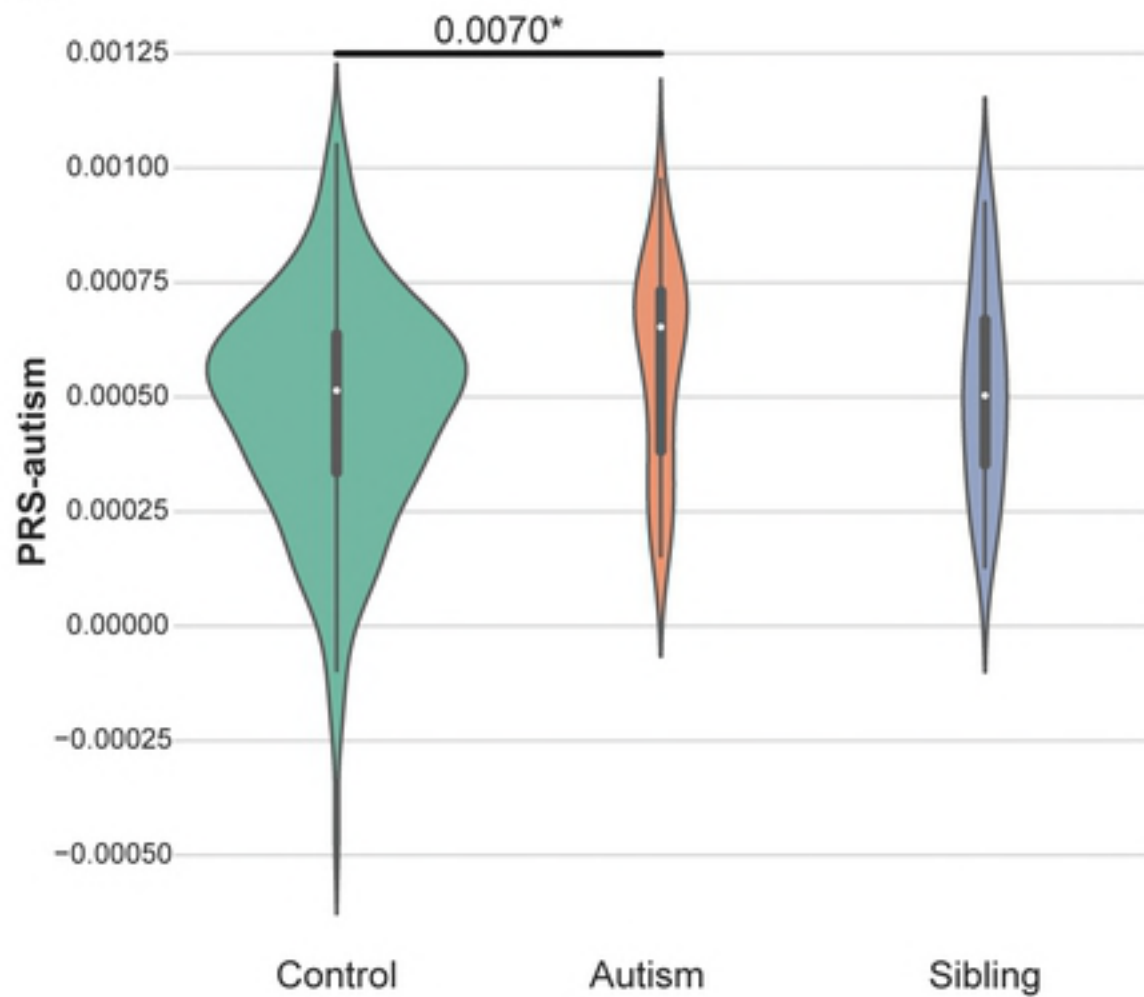**B**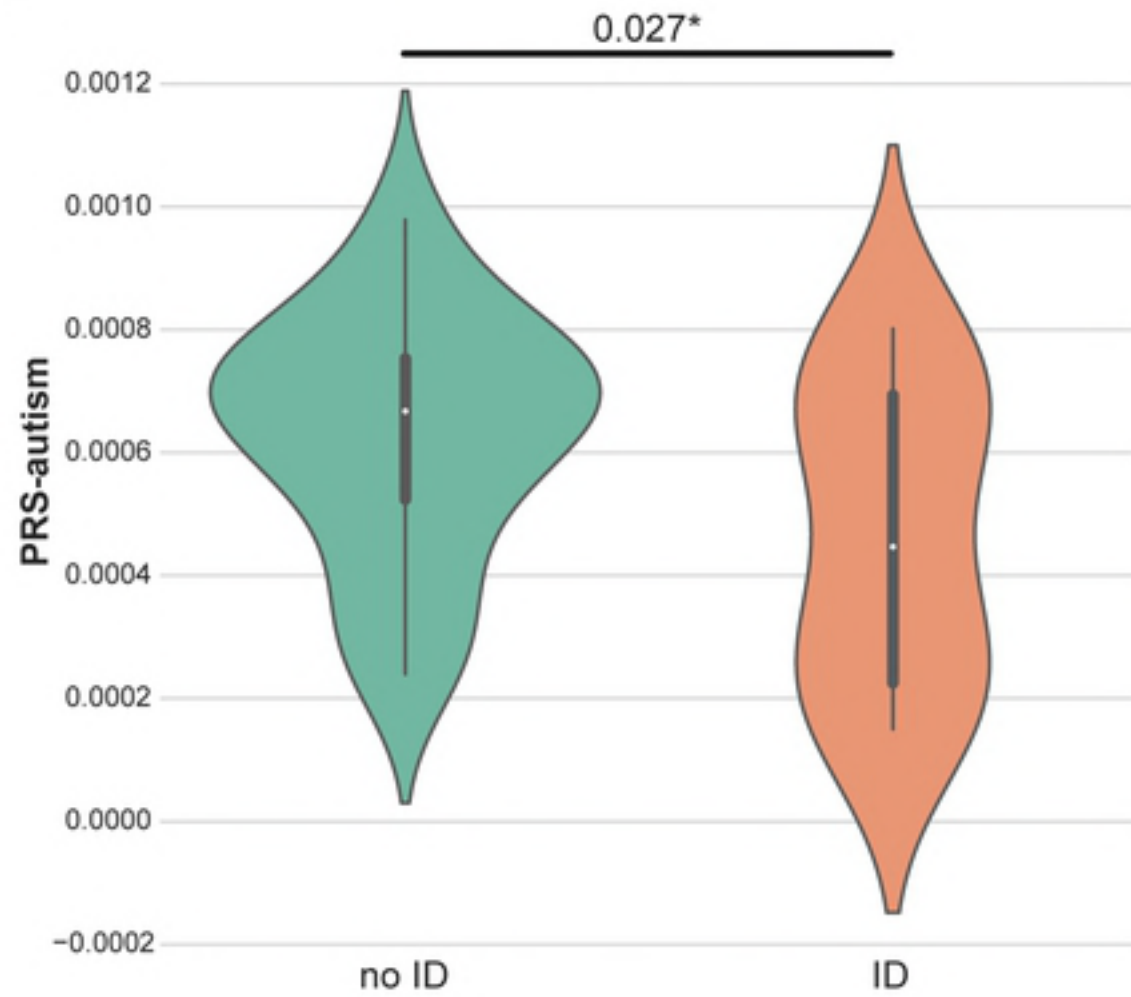

Source: http://biorxiv.org/content/10.1101/363853v1.full.pdf
